# Supplementary material for: PPARG Could Work as a Valid Therapeutic Strategy for the Treatment of Lung Squamous Cell Carcinoma
Source: PPAR Res. 2020 Jun 1;2020:2510951. doi: 10.1155/2020/2510951 (PMC7285416; doi:10.1155/2020/2510951)
Supplement: Supplementary Materials — (1) GSEA1 and GAEA2 present GSEA results for the genes within Figure 2 and Figure 3, respectively. (2) Mega-analysis presents the mega-analysis results for PPARG gene and its driven genes within the Figure 2 and Figure 3. (3) Partial_Mega-analysis presents the partial mega-analysis results for PPARG; (4) LSCC_diagnostic network presents the reference information for the network presented in Figure 2. (4) LSCC_prognostic network presents the reference information for the network presented in Figure 3. [file 2510951.f1.xlsx]

## Sheet: GSEA1
Name	# of Entities	GO ID	Overlap	Percent Overlap	Overlapping Entities	p-value	Jaccard similarity	Hit type	p-value_beforeFDR	crit-p	beSignificant
GO: positive regulation of protein polyubiquitination	11	1902916;	3	27	UBE2D1;XIAP;SKP2	0.000847021	0.142857	GO: biological_process	2.09918e-08	4.38373e-05	TRUE
GO: regulation of smooth muscle cell proliferation	215	0048660;	5	2	PPARG;STAT1;MIR21;MIR223;SKP2	0.00121246	0.0224215	GO: biological_process	6.98954e-08		TRUE
GO: regulation of protein polyubiquitination	21	1902914;	3	14	UBE2D1;XIAP;SKP2	0.00146089	0.0967742	GO: biological_process	1.68674e-07		TRUE
GO: positive regulation of protein ubiquitination	127	0031398;	4	3	XIAP;UBE2D1;SKP2;ANGPT1	0.0035909	0.0294118	GO: biological_process	5.33963e-07		TRUE
GO: positive regulation of protein modification by small protein conjugation or removal	149	1903322;	4	2	XIAP;UBE2D1;SKP2;ANGPT1	0.00496886	0.0253165	GO: biological_process	1.0121e-06		TRUE
GO: regulation of response to cytokine stimulus	175	0060759;	4	2	PPARG;MIR21;STAT1;ANGPT1	0.00517114	0.0217391	GO: biological_process	1.92236e-06		TRUE
GO: regulation of cytokine-mediated signaling pathway	163	0001959;	4	2	PPARG;MIR21;STAT1;ANGPT1	0.00517114	0.0232558	GO: biological_process	1.44845e-06		TRUE
GO: regulation of endothelial cell proliferation	204	0001936;	4	1	PPARG;STAT1;MIR21;ANGPT1	0.00792661	0.0187793	GO: biological_process	3.53603e-06		TRUE
GO: regulation of protein ubiquitination	220	0031396;	4	1	XIAP;UBE2D1;SKP2;ANGPT1	0.0101298	0.0174672	GO: biological_process	4.76993e-06		TRUE
GO: regulation of response to external stimulus	977	0032101;	6	0	XIAP;PPARG;MIR21;PDPN;FOXA2;STAT1	0.0116147	0.00609756	GO: biological_process	6.33269e-06		TRUE
GO: macrophage derived foam cell differentiation	7	0010742;	2	28	PPARG;STAT1	0.0116147	0.111111	GO: biological_process	5.78211e-06		TRUE
GO: regulation of protein modification by small protein conjugation or removal	251	1903320;	4	1	XIAP;UBE2D1;SKP2;ANGPT1	0.013506	0.0153846	GO: biological_process	8.03333e-06		TRUE
GO: foam cell differentiation	8	0090077;	2	25	PPARG;STAT1	0.013506	0.105263	GO: biological_process	7.7071e-06		TRUE
GO: negative regulation of endothelial cell proliferation	87	0001937;	3	3	PPARG;MIR21;STAT1	0.0194873	0.0309278	GO: biological_process	1.31654e-05		TRUE
GO: regulation of vascular smooth muscle cell proliferation	91	1904705;	3	3	PPARG;MIR21;MIR223	0.0209686	0.029703	GO: biological_process	1.50704e-05		TRUE
GO: regulation of epithelial to mesenchymal transition	98	0010717;	3	3	MIR21;FOXA2;PDPN	0.025321	0.0277778	GO: biological_process	1.88261e-05		TRUE
GO: tube morphogenesis	347	0035239;	4	1	MIR21;FOXA2;ANGPT1;PDPN	0.0340464	0.011236	GO: biological_process	2.86884e-05		TRUE
GO: response to extracellular stimulus	761	0009991;	5	0	PPARG;ANGPT1;FOXA2;STAT1;SKP2	0.0396449	0.00650195	GO: biological_process	3.43884e-05		TRUE
GO: response to nutrient	370	0007584;	4	1	PPARG;STAT1;FOXA2;ANGPT1	0.0413198	0.0105541	GO: biological_process	3.68652e-05		TRUE
GO: perinuclear region of cytoplasm	819	0048471;	5	0	XIAP;PPARG;MIR223;STAT1;ACKR3	0.0447318	0.00604595	GO: cellular_component	4.10181e-05		TRUE
GO: positive regulation of smooth muscle cell proliferation	130	0048661;	3	2	MIR21;STAT1;SKP2	0.0465483	0.0214286	GO: biological_process	4.38373e-05		TRUE

## Sheet: GSEA2
Name	# of Entities	GO ID	Overlap	Percent Overlap	Overlapping Entities	p-value	Jaccard similarity	Hit type	p-value_beforeFDR	crit-p	beSignificant
GO: positive regulation of small molecule metabolic process	173	0062013;	4	2	PPARG;NOS2;STK11;TNF	0.000542291	0.0229885	GO: biological_process	1.34403e-08	0.000106901	TRUE
GO: regulation of small molecule metabolic process	422	0062012;	4	0	PPARG;STK11;NOS2;TNF	0.00356499	0.00945626	GO: biological_process	4.81698e-07		TRUE
GO: fatty acid transport	80	0015908;	3	3	PPARG;NOS2;ACE	0.00356499	0.0365854	GO: biological_process	3.64624e-07		TRUE
GO: receptor biosynthetic process	6	0032800;	2	33	PPARG;TNF	0.00356499	0.222222	GO: biological_process	5.30136e-07		TRUE
GO: response to oxygen levels	544	0070482;	4	0	PPARG;ACE;NOS2;TNF	0.0048745	0.00733945	GO: biological_process	1.32892e-06		TRUE
GO: regulation of inflammatory response	504	0050727;	4	0	PPARG;ACE;NOS2;TNF	0.0048745	0.00792079	GO: biological_process	9.7958e-07		TRUE
GO: cellular response to organic cyclic compound	634	0071407;	4	0	PPARG;ACE;NOS2;TNF	0.0075977	0.00629921	GO: biological_process	2.44795e-06		TRUE
GO: regulation of hormone levels	663	0010817;	4	0	PPARG;ACE;NOS2;TNF	0.00767951	0.0060241	GO: biological_process	2.92582e-06		TRUE
GO: monocarboxylic acid transport	158	0015718;	3	1	PPARG;NOS2;ACE	0.00767951	0.01875	GO: biological_process	2.8482e-06		TRUE
CSF2 -> STAT Expression Targets	72	NONE	4	5	PPARG;NOS2;TNF;ACE	0.00767951	0.0547945	Biomarkers	3.04531e-06		TRUE
GO: positive regulation of programmed cell death	800	0043068;	4	0	PPARG;ACE;NOS2;TNF	0.010846	0.00499376	GO: biological_process	6.18268e-06		TRUE
GO: positive regulation of apoptotic process	793	0043065;	4	0	PPARG;ACE;NOS2;TNF	0.010846	0.00503778	GO: biological_process	5.97016e-06		TRUE
GO: cellular response to lipid	767	0071396;	4	0	PPARG;ACE;NOS2;TNF	0.010846	0.00520833	GO: biological_process	5.22821e-06		TRUE
GO: negative regulation of epithelial cell proliferation	200	0050680;	3	1	PPARG;STK11;TNF	0.010846	0.0148515	GO: biological_process	5.78471e-06		TRUE
GO: regulation of blood pressure	197	0008217;	3	1	PPARG;NOS2;ACE	0.010846	0.0150754	GO: biological_process	5.52806e-06		TRUE
GO: negative regulation of lipid storage	20	0010888;	2	10	PPARG;TNF	0.0111061	0.0869565	GO: biological_process	6.70715e-06		TRUE
GO: cellular response to lithium ion	22	0071285;	2	9	PPARG;NOS2	0.0126524	0.08	GO: biological_process	8.15311e-06		TRUE
GO: regulation of protein kinase activity	884	0045859;	4	0	ACE;STK11;NOS2;TNF	0.0127967	0.00451977	GO: biological_process	9.19758e-06		TRUE
GO: positive regulation of cell death	870	0010942;	4	0	PPARG;ACE;NOS2;TNF	0.0127967	0.00459242	GO: biological_process	8.63187e-06		TRUE
GO: negative regulation of cell junction assembly	23	1901889;	2	8	TNF;ACE	0.0127967	0.0769231	GO: biological_process	8.92885e-06		TRUE
GO: regulation of defense response	909	0031347;	4	0	PPARG;ACE;NOS2;TNF	0.0137779	0.0043956	GO: biological_process	1.0276e-05		TRUE
GO: negative regulation of glucose import	25	0046325;	2	7	TNF;ACE	0.0137779	0.0714286	GO: biological_process	1.05858e-05		TRUE
GO: carbohydrate homeostasis	259	0033500;	3	1	PPARG;ACE;STK11	0.0153556	0.0114943	GO: biological_process	1.25591e-05		TRUE
GO: glucose homeostasis	258	0042593;	3	1	PPARG;ACE;STK11	0.0153556	0.0115385	GO: biological_process	1.24144e-05		TRUE
GO: regulation of kinase activity	987	0043549;	4	0	ACE;STK11;NOS2;TNF	0.0155421	0.00404858	GO: biological_process	1.42524e-05		TRUE
GO: regulation of secretion	985	0051046;	4	0	PPARG;ACE;NOS2;TNF	0.0155421	0.0040568	GO: biological_process	1.4138e-05		TRUE
GO: regulation of response to external stimulus	977	0032101;	4	0	PPARG;ACE;NOS2;TNF	0.0155421	0.00408998	GO: biological_process	1.36874e-05		TRUE
GO: regulation of peptide hormone secretion	267	0090276;	3	1	PPARG;NOS2;TNF	0.0155421	0.0111524	GO: biological_process	1.3757e-05		TRUE
GO: icosanoid secretion	30	0032309;	2	6	NOS2;ACE	0.0158732	0.0606061	GO: biological_process	1.53429e-05		TRUE
GO: negative regulation of glucose transmembrane transport	30	0010829;	2	6	TNF;ACE	0.0158732	0.0606061	GO: biological_process	1.53429e-05		TRUE
GO: negative regulation of secretion	283	0051048;	3	1	PPARG;ACE;TNF	0.0165176	0.0105263	GO: biological_process	1.63752e-05		TRUE
GO: response to xenobiotic stimulus	292	0009410;	3	1	PPARG;NOS2;ACE	0.0172759	0.0102041	GO: biological_process	1.79833e-05		TRUE
GO: organic acid transport	314	0015849;	3	0	PPARG;NOS2;ACE	0.018033	0.00949367	GO: biological_process	2.23468e-05		TRUE
GO: carboxylic acid transport	314	0046942;	3	0	PPARG;NOS2;ACE	0.018033	0.00949367	GO: biological_process	2.23468e-05		TRUE
GO: lipid transport	309	0006869;	3	0	PPARG;NOS2;ACE	0.018033	0.0096463	GO: biological_process	2.12997e-05		TRUE
GO: response to glucocorticoid	299	0051384;	3	1	NOS2;ACE;TNF	0.018033	0.00996678	GO: biological_process	1.93039e-05		TRUE
GO: cellular response to vitamin	36	0071295;	2	5	PPARG;NOS2	0.018033	0.0512821	GO: biological_process	2.22096e-05		TRUE
GO: fatty acid derivative transport	35	1901571;	2	5	NOS2;ACE	0.018033	0.0526316	GO: biological_process	2.09775e-05		TRUE
GO: icosanoid transport	35	0071715;	2	5	NOS2;ACE	0.018033	0.0526316	GO: biological_process	2.09775e-05		TRUE
GO: response to corticosteroid	325	0031960;	3	0	NOS2;ACE;TNF	0.0195959	0.00917431	GO: biological_process	2.47693e-05		TRUE
GO: response to mechanical stimulus	334	0009612;	3	0	PPARG;NOS2;TNF	0.0200813	0.00892857	GO: biological_process	2.68759e-05		TRUE
GO: negative regulation of growth	331	0045926;	3	0	PPARG;STK11;TNF	0.0200813	0.00900901	GO: biological_process	2.6161e-05		TRUE
GO: rhythmic process	349	0048511;	3	0	PPARG;NOS2;TNF	0.021692	0.00854701	GO: biological_process	3.06445e-05		TRUE
GO: regulation of hormone secretion	348	0046883;	3	0	PPARG;NOS2;TNF	0.021692	0.00857143	GO: biological_process	3.03831e-05		TRUE
GO: response to lithium ion	44	0010226;	2	4	PPARG;NOS2	0.0231123	0.0425532	GO: biological_process	3.33272e-05		TRUE
GO: regulation of lipid storage	48	0010883;	2	4	PPARG;TNF	0.0262762	0.0392157	GO: biological_process	3.97256e-05		TRUE
GO: response to immobilization stress	49	0035902;	2	4	PPARG;NOS2	0.0265224	0.0384615	GO: biological_process	4.14125e-05		TRUE
GO: blood vessel remodeling	51	0001974;	2	3	NOS2;ACE	0.0270339	0.037037	GO: biological_process	4.48912e-05		TRUE
GO: response to ketone	419	1901654;	3	0	PPARG;ACE;NOS2	0.0300448	0.00712589	GO: biological_process	5.28696e-05		TRUE
GO: response to steroid hormone	418	0048545;	3	0	ACE;NOS2;TNF	0.0300448	0.00714286	GO: biological_process	5.24944e-05		TRUE
GO: response to hypoxia	424	0001666;	3	0	ACE;NOS2;TNF	0.0306937	0.00704225	GO: biological_process	5.47721e-05		TRUE
GO: regulation of lipid metabolic process	441	0019216;	3	0	PPARG;STK11;TNF	0.0335009	0.00677201	GO: biological_process	6.15779e-05		TRUE
GO: negative regulation of lipid localization	60	1905953;	2	3	PPARG;TNF	0.0335009	0.031746	GO: biological_process	6.22724e-05		TRUE
GO: long-chain fatty acid transport	61	0015909;	2	3	PPARG;ACE	0.0341779	0.03125	GO: biological_process	6.43779e-05		TRUE
GO: regulation of epithelial cell proliferation	454	0050678;	3	0	PPARG;STK11;TNF	0.0347967	0.00657895	GO: biological_process	6.7143e-05		TRUE
GO: response to decreased oxygen levels	461	0036293;	3	0	ACE;NOS2;TNF	0.0358906	0.00647948	GO: biological_process	7.02725e-05		TRUE
GO: organic anion transport	476	0015711;	3	0	PPARG;ACE;NOS2	0.0387659	0.00627615	GO: biological_process	7.72995e-05		TRUE
GO: positive regulation of phagocytosis	73	0050766;	2	2	PPARG;TNF	0.0439834	0.0263158	GO: biological_process	9.23575e-05		TRUE

## Sheet: Mega-anlaysis
geneName	beRandomEffectsModel	nStudy	abs_Z	mT	mSE	LL	UL	Z	p1	ISq	PValue_Q	Constant	nSample	Country	studyAge
HOXA10	0	9	3.12261	0.315094	0.100907	0.117316	0.512873	3.12261	0.000896271	0	0.599571	0.499958	0.655652	0.0933505	0.669486
SDC1	1	11	3.01256	0.637391	0.211578	0.222698	1.05208	3.01256	0.00129528	36.8741	0.104265	0.50002	0.955903	8.38178e-06	0.704683
CFLAR	0	11	2.86045	-0.293129	0.102477	-0.493983	-0.0922746	-2.86045	0.00211523	28.9568	0.169556	0.500671	0.947756	0.0107624	0.537176
ANGPT1	0	10	2.61117	-0.0981597	0.0375922	-0.17184	-0.0244789	-2.61117	0.00451166	3.90893	0.404188	0.500801	0.0812987	0.00770195	0.916213
CTNNB1	0	12	2.15411	-0.104766	0.0486355	-0.200092	-0.00944077	-2.15411	0.0156157	0	0.919861	0.501795	0.561714	1.63103e-05	0.713098
SKP2	1	11	2.06839	0.379617	0.183533	0.0198925	0.739342	2.06839	0.0193018	62.1784	0.00319149	0.500547	0.254156	0.00133813	0.802837
FOXA2	1	11	2.0026	-0.599875	0.299548	-1.18699	-0.0127616	-2.0026	0.02261	67.0913	0.00074021	0.500901	0.863429	0.00514801	0.430841
CTLA4	0	9	1.53027	0.190218	0.124303	-0.0534163	0.433851	1.53027	0.0629745	0	0.597906	0.500478	0.850872	0.00242482	0.179107
PPARG	1	11	1.31744	-0.217577	0.165151	-0.541273	0.106119	-1.31744	0.0938455	45.096	0.0514657	0.501204	0.847465	0.00448271	0.306449
STAT1	0	12	1.2945	0.157243	0.121471	-0.0808393	0.395326	1.2945	0.0977472	0	0.985485	0.500063	0.771948	0.00377759	0.54366
CYP2A6	1	10	1.27144	-0.147079	0.115679	-0.373809	0.0796523	-1.27144	0.101787	63.4709	0.00339893	0.501333	0.150625	0.0410207	0.189638
UBE2D1	0	12	1.23214	0.0635524	0.0515789	-0.0375423	0.164647	1.23214	0.108948	0	0.781735	0.498555	0.997937	0.000959408	0.988731
TNF	1	11	1.22086	-0.183783	0.150536	-0.478834	0.111267	-1.22086	0.111069	68.5609	0.0004311	0.499687	0.891812	0.196886	0.841056
MIR21	0	4	1.20767	0.337283	0.279285	-0.210116	0.884682	1.20767	0.113588	0	0.66397	1	1	0	0
ACKR3	1	10	1.10607	0.240923	0.217818	-0.186	0.667846	1.10607	0.134347	38.1729	0.103854	0.499962	0.752821	0.0318277	0.832122
ACE	0	9	1.07693	-0.058486	0.0543081	-0.16493	0.0479579	-1.07693	0.140756	29.5481	0.18237	0.500652	0.616291	0.000958454	0.821967
MIR223	0	1	0.996907	-0.10731	0.107643	-0.31829	0.10367	-0.996907	0.159405	100	0
STK11	0	12	0.755359	0.0573133	0.0758756	-0.0914028	0.206029	0.755359	0.225017	0	0.937738	0.501137	0.372198	2.67871e-05	0.965996
TP53	0	9	0.739747	0.0373691	0.0505161	-0.0616424	0.136381	0.739747	0.229727	0	0.691163	0.500545	0.750743	0.00322385	0.572975
XIAP	0	11	0.711533	0.0269287	0.0378461	-0.0472495	0.101107	0.711533	0.238377	0	0.834135	0.500768	0.214423	0.00058984	0.541122
NOS2	0	10	0.351975	-0.0480794	0.136599	-0.315813	0.219654	-0.351975	0.362428	0	0.968657	0.500775	0.0916788	0.00524159	0.496552
TIMP1	0	10	0.222363	-0.0294831	0.13259	-0.289359	0.230393	-0.222363	0.412015	0	0.926488	0.500325	0.535006	0.0629435	0.549262
PDPN	0	11	0.215073	0.0389601	0.181148	-0.316091	0.394011	0.215073	0.414855	0	0.789964	0.499973	0.86733	0.0155151	0.904991
CRP	0	11	0.0814376	-0.0038505	0.0472816	-0.0965225	0.0888215	-0.0814376	0.467547	0	0.871525	0.500296	0.128106	0.0484301	0.956691
PTEN	0	12	0.0802177	0.00831836	0.103697	-0.194928	0.211565	0.0802177	0.468032	0	0.708987	0.500585	0.819082	0.00559874	0.359153
MAPK8	0	11	0.0271028	0.00191862	0.0707904	-0.136831	0.140668	0.0271028	0.489189	0	0.91022	0.500966	0.139121	0.00201021	0.344174

## Sheet: Partial_Mega-analysis
geneName	beRandomEffectsModel	nStudy	abs_Z	mT	mSE	LL	UL	Z	p1	ISq	PValue_Q	Constant	nSample	Country	studyAge
PPARG	0	5	3.18339	-1.08362	0.340399	-1.75081	-0.41644	-3.18339	0.000727813	0	0.641529	0.535246	0.102443	2.78781e-06	0.000335827

## Sheet: LSCC_diagnostic network
Relation	Type	Sentence	TextRef	PMID	PubYear	Title
PPARG ---| HOXA10	Expression	Forced expression of Pparg inhibited activation of Hoxa10 promoter in a gene dose-dependent manner ( E).	info:pmid/24080087#body:147	24080087	2013	Aldehyde dehydrogenase-1a1 induces oncogene suppressor genes in B cell populations
PPARG ---| HOXA10	Expression	Pparg inhibited the promoter of Hoxa10, while Rara and Rxra only modestly regulated this transcription factor ( F, G).	info:pmid/24080087#body:216	24080087	2013	Aldehyde dehydrogenase-1a1 induces oncogene suppressor genes in B cell populations
PPARG ---| HOXA10	Expression	Pparg inhibited the promoter of Hoxa10, while Rara and Rxra only modestly regulated this transcription factor ( F, G).	info:pmid/24080087#body:215	24080087	2013	Aldehyde dehydrogenase-1a1 induces oncogene suppressor genes in B cell populations
PPARG ---| HOXA10	Expression	Pparg expression also markedly suppressed Hoxa10 promoter activation in a ligand (rosiglitazone)-dependent manner ( F).	info:pmid/24080087#body:149	24080087	2013	Aldehyde dehydrogenase-1a1 induces oncogene suppressor genes in B cell populations
PPARG ---| HOXA10	Expression	Pparg expression also markedly suppressed Hoxa10 promoter activation in a ligand (rosiglitazone)-dependent manner ( F).	info:pmid/24080087#body:148	24080087	2013	Aldehyde dehydrogenase-1a1 induces oncogene suppressor genes in B cell populations
PPARG ---| HOXA10	Expression	Pparg induction by Aldh1a1 appears to be a critical event, because Pparg was an effective suppressor of Hoxa10, a key transcription factor perturbing myeloid and lymphoid differentiation in mice and humans .	info:pmid/24080087#body:214	24080087	2013	Aldehyde dehydrogenase-1a1 induces oncogene suppressor genes in B cell populations
PPARG ---| HOXA10	Expression		Admin imported
PPARG ---| UBE2D1	Regulation	Next, following sumoylation, PPAR? interacts with the nuclear corepressor (NCoR) complex to prevent signal-dependent recruitment of ubiquitin-conjugating enzymes (such as UBCH5) and the 19S proteasome components necessary for NCoR clearance [31].	info:pmid/22851964#cont:73	22851964	2012	PPAR? expression and function in mycobacterial infection: Roles in lipid metabolism, immunity, and bacterial killing
PPARG ---| MIR21	Expression	Activation of PPAR? inhibited miR-21 expression and resultant proliferation, while restoring PDCD4 levels and apoptosis to baseline.	info:pmid/28522568#abs:8	28522568	2017	Peroxisome proliferator-activated receptor-? enhances human pulmonary artery smooth muscle cell apoptosis through microRNA-21 and programmed cell death 4.
PPARG ---| MIR21	Expression	In the current study, we hypothesize that PPAR? stimulates PDCD4 expression and human pulmonary artery smooth muscle cells apoptosis by inhibiting miR-21.	info:pmid/28522568#abs:5	28522568	2017	Peroxisome Proliferator-Activated Receptor Gamma Enhances Human Pulmonary Artery Smooth Muscle Cell Apoptosis Through MicroRNA-21 and Programmed Cell Death 4.
PPARG ---| MIR21	Expression	We previously demonstrated that pharmacological activation of the nuclear transcription factor, peroxisome proliferator-activated receptor gamma (PPAR?), attenuated hypoxia-induced proliferation of human pulmonary artery smooth muscle cells by inhibiting the expression and mitogenic functions of microRNA-21 (miR-21).	info:pmid/28522568#abs:4	28522568	2017	Peroxisome Proliferator-Activated Receptor Gamma Enhances Human Pulmonary Artery Smooth Muscle Cell Apoptosis Through MicroRNA-21 and Programmed Cell Death 4.
PPARG ---| MIR21	Expression	These findings differ from our observations that PPAR? ligands attenuate miR-21 levels.	info:pmid/26208095#cont:244	26208095	2015	PPAR? ligands attenuate hypoxia-induced proliferation in human pulmonary artery smooth muscle cells through modulation of MicroRNA-21
PPARG ---| MIR21	Expression	We additionally determined that activation of PPAR? restored PDCD4 levels indirectly by inhibiting the expression of miR-21.	info:pmid/28522568#cont:422	28522568	2017	Peroxisome proliferator-activated receptor-? enhances human pulmonary artery smooth muscle cell apoptosis through microRNA-21 and programmed cell death 4
PPARG ---| MIR21	Expression	Collectively, our findings confirm that TGF-ß1 is an important target through which PPAR? agonists modulate miR-21 expression.	info:pmid/26208095#cont:270	26208095	2015	PPAR? ligands attenuate hypoxia-induced proliferation in human pulmonary artery smooth muscle cells through modulation of MicroRNA-21
PPARG ---| MIR21	Expression	The study demonstrates that, PPAR gamma ligands regulate proliferative response by preventing miR-21 expression.	info:pmid/28597404#cont:90	28597404	2017	Relevance of microRNA 21 in Different Types of Hypertension
PPARG ---| MIR21	Expression	The precise mechanisms by which PPAR? regulates miR-21 expression remain to be defined and constitute an active area of investigation in our laboratory.	info:pmid/28522568#cont:393	28522568	2017	Peroxisome proliferator-activated receptor-? enhances human pulmonary artery smooth muscle cell apoptosis through microRNA-21 and programmed cell death 4
PPARG ---| MIR21	Expression	Activation of PPAR? inhibited miR-21 expression and resultant proliferation, while restoring PDCD4 levels and apoptosis to baseline.	info:pmid/28522568#cont:16	28522568	2017	Peroxisome proliferator-activated receptor-? enhances human pulmonary artery smooth muscle cell apoptosis through microRNA-21 and programmed cell death 4
PPARG ---| MIR21	Expression	PPAR? suppresses hypoxia-induced human pulmonary artery smooth muscle cell miR-21 expression, proliferation, and apoptosis resistance.	info:pmid/28522568#cont:302	28522568	2017	Peroxisome proliferator-activated receptor-? enhances human pulmonary artery smooth muscle cell apoptosis through microRNA-21 and programmed cell death 4
PPARG ---| MIR21	Expression	Given the totality of these findings, we postulated that the activation of PPAR? attenuates the hypoxia-induced activation of activated protein-1, thereby inhibiting the transcription of miR-21.	info:pmid/28522568#cont:397	28522568	2017	Peroxisome proliferator-activated receptor-? enhances human pulmonary artery smooth muscle cell apoptosis through microRNA-21 and programmed cell death 4
PPARG ---| MIR21	Expression	PPAR? modulates hypoxia-induced alterations in miR-21 and PDCD4 expression to enhance apoptosis and attenuate human pulmonary artery smooth muscle cell proliferation.	info:pmid/28522568#cont:347	28522568	2017	Peroxisome proliferator-activated receptor-? enhances human pulmonary artery smooth muscle cell apoptosis through microRNA-21 and programmed cell death 4
PPARG ---| MIR21	Expression	Furthermore, because miR-21 suppresses the translation of PDCD4, activation of PPAR? in essence abrogates the repression of PDCD4 and enhances its expression by inhibiting the stimulatory effects of hypoxia on miR-21 transcription.	info:pmid/28522568#cont:398	28522568	2017	Peroxisome proliferator-activated receptor-? enhances human pulmonary artery smooth muscle cell apoptosis through microRNA-21 and programmed cell death 4
PPARG ---| MIR21	Expression	Therapeutically, adenovirus-mediated PPAR? overexpression reversed the aforementioned signaling derangements by 1) attenuating hypoxia-induced miR-21 expression and 2) restoring PDCD4 levels and apoptosis through activation of caspase-3.	info:pmid/28522568#cont:374	28522568	2017	Peroxisome proliferator-activated receptor-? enhances human pulmonary artery smooth muscle cell apoptosis through microRNA-21 and programmed cell death 4
PPARG ---| MIR21	Expression	Peroxisome proliferator-activated receptor-? agonists (rosiglitazone) has reported to attenuate hypoxia-induced HPASMC proliferation, vascular remodeling and Pulmonary arterial hypertension through inhibition of hypoxia-induced miR-21 expression, which emerged as an important miRNA that contributes to Pulmonary arterial hypertension pathogenesis [72].	info:pmid/28573430#cont:304	28573430	2017	Critical effects of epigenetic regulation in pulmonary arterial hypertension
PPARG ---| MIR21	Expression	However, peroxisome proliferator-activated receptor? activation exerted an antiproliferative role through suppression of hypoxia-induced miRNA-21 transcription.	info:doi/10.1155/2018/8530371#cont:156		2018	Crosstalk between MicroRNAs and peroxisome proliferator-activated receptors and their emerging regulatory roles in cardiovascular pathophysiology
lung squamous cell carcinoma --+> PDPN	QuantitativeChange	Aggrus expression is reportedly upregulated in lung squamous cell carcinoma but not in lung adenocarcinoma [11–13].	info:pmid/23991201#cont:197	23991201	2013	Platelets Promote Tumor Growth and Metastasis via Direct Interaction between Aggrus/Podoplanin and CLEC-2
lung squamous cell carcinoma --+> PDPN	QuantitativeChange	Suzuki et al. mentioned that high podoplanin expression was significantly correlated with a lower incidence of lymph node metastasis in lung squamous cell carcinoma (27).	info:pmid/26700593#cont:320	26700593	2015	Podoplanin expression is correlated with the prognosis of lung squamous cell carcinoma
lung squamous cell carcinoma --+> PDPN	QuantitativeChange	[44] demonstrated that lung squamous cell carcinoma patients with high podoplanin expression in their tumors exhibit a much lower incidence of lymph node metastasis.	info:pmid/25142945#cont:54	25142945	2014	Podoplanin: a novel regulator of tumor invasion and metastasis
lung squamous cell carcinoma --+> PDPN	QuantitativeChange	The body of our findings in the present study is that the lung squamous cell carcinoma patients with high podoplanin expression in cancer cells exhibited a much lower incidence of lymph node metastasis.	info:pmid/21194851#body:66	21194851	2011	High podoplanin expression in cancer cells predicts lower incidence of nodal metastasis in patients with lung squamous cell carcinoma
PPARG --+> ANGPT1	Regulation	High level of induction, however, was observed with the PPAR-gamma-induced angiopoietin-related gene, PGAR.	info:pmid/15579652#abs:9	15579652	2004	Induction of adipocyte-like phenotype in human mesenchymal stem cells by hypoxia.
PPARG --+> ANGPT1	Regulation	peroxisome proliferator-activated receptor-? also induces the expression of a secreted protein (peroxisome proliferator-activated receptor-? angiopoietin-related gene [PGAR]) (39) from the angiopoietin family.	info:pmid/14749265#body:165	14749265	2004	The biology of peroxisome proliferator-activated receptors: relationship with lipid metabolism and insulin sensitivity.
PPARG ---| ACKR3	Expression	More importantly, pioglitazone therapy-induced PPAR? activation suppresses CXCR7 expression in human carotid atherosclerotic lesions.	info:pmid/26507929#abs:5	26507929	2015	Pioglitazone Suppresses CXCR7 Expression To Inhibit Human Macrophage Chemotaxis through Peroxisome Proliferator-Activated Receptor ?.
PPARG ---| ACKR3	Expression		Admin imported
lung squamous cell carcinoma --+> MIR21	QuantitativeChange	MiR-21 was overexpressed in 73.3% of the squamous cell lung carcinoma specimens examined (P = 0.022).	info:pmid/20508945#abs:5	20508945	2011	MiR-21 overexpression in human primary squamous cell lung carcinoma is associated with poor patient prognosis.
lung squamous cell carcinoma --+> MIR21	QuantitativeChange	In contrast, miR-21 is overexpressed in human squamous cell lung carcinoma and associated with poor patient prognosis.13	info:pmid/25046358#cont:29	25046358	2014	A novel small-molecule compound diaporine A inhibits non-small cell lung cancer growth by regulating miR-99a/mTOR signaling
lung squamous cell carcinoma ---| FOXA2	QuantitativeChange	FOXA2 expression was decreased in Lung squamous cell carcinoma tissues compared with adjacent normal tissues and knockdown of FOXA2 increased NCI-H292 cells proliferation.	info:pmid/29456509#abs:5	29456509	2018	Curcumin Inhibits Growth of Human NCI-H292 Lung Squamous Cell Carcinoma Cells by Increasing FOXA2 Expression.
lung squamous cell carcinoma --+> ACKR3	QuantitativeChange	Also, Clinical Lung Cancer Genome Project data showed that lung squamous cell carcinoma had the highest CXCR7 transcript levels compared with other lung cancer subtypes.	info:pmid/26912435#abs:10	26912435	2016	Targeted Imaging of the Atypical Chemokine Receptor 3 (ACKR3/CXCR7) in Human Cancer Xenografts.
lung squamous cell carcinoma ---| CYP2A6	QuantitativeChange	The risk of developing squamous cell lung cancer was significantly lower in the groups with abolished or greatly reduced CYP2A6 activity.	info:pmid/26091970#body:92	26091970	2015	CYP2A6 genetic polymorphism is associated with decreased susceptibility to squamous cell lung cancer in Japanese smokers
lung squamous cell carcinoma --+> SKP2	QuantitativeChange	lung squamous cell carcinoma with high Skp2 expression may have robust proliferation ability.	info:pmid/30127874#abs:14	30127874	2018	Skp2 expression has different clinicopathological and prognostic implications in lung adenocarcinoma and squamous cell carcinoma.
PPARG --+> MIR223	Expression	In BM-derived macrophages, PPAR? directly enhanced miR-223 expression upon exposure to Th2 stimuli.	info:pmid/26436647#abs:3	26436647	2015	MicroRNA-223 is a crucial mediator of PPAR?-regulated alternative macrophage activation.
PPARG --+> MIR223	Expression	On stimulation with Th2 cytokines (IL-4 or IL13), peroxisome proliferator-activated receptor gamma activation in murine macrophages induced miR223 expression by binding upstream of miR223, which in turn inhibited the expression of nuclear factor of activated T-cells 5 and RAS p21 protein activator 1, promoting the development of an anti-inflammatory M2-like phenotype.	info:pmid/29154757#body:138	29154757	2017	Macrophage polarization and meta-inflammation
PPARG --+> MIR223	Expression		Admin imported
PPARG --+> MIR223	Expression	PPAR? regulates miR-223 expression by binding to 3 PPAR? regulatory elements in its promoter.	info:doi/10.1172/JCI81656#cont:189		2015	MicroRNA-223 is a crucial mediator of PPAR?-regulated alternative macrophage activation
PPARG --+> MIR223	Expression	PPAR? regulates miR-223 expression by binding to 3 PPAR? regulatory elements in its promoter.	info:doi/10.1172/JCI81656#cont:96		2015	MicroRNA-223 is a crucial mediator of PPAR?-regulated alternative macrophage activation
PPARG --+> MIR223	Expression	In BM-derived macrophages, PPAR? directly enhanced miR-223 expression upon exposure to Th2 stimuli.	info:doi/10.1172/JCI81656#cont:11		2015	MicroRNA-223 is a crucial mediator of PPAR?-regulated alternative macrophage activation
PPARG --+> MIR223	Expression	PPAR? can control miR-223 expression by directly binding to the PPAR? regulatory elements located in the Mir223 promoter.	info:doi/10.1172/JCI81656#cont:37		2015	MicroRNA-223 is a crucial mediator of PPAR?-regulated alternative macrophage activation
PPARG --+> MIR223	Expression	We also observed that inhibition of PPAR? action impaired its induction of miR-223 expression in M2 macrophages (Figure 1A), suggesting that Mir223 is a PPAR?-induced gene.	info:doi/10.1172/JCI81656#cont:202		2015	MicroRNA-223 is a crucial mediator of PPAR?-regulated alternative macrophage activation
PPARG --+> MIR223	Expression	Of note, pioglitazone treatment enhanced miR-223 induction in isolated adipose tissue macrophages from high-fat diet-WT mice (Figure 4A), confirming our observation that PPAR? activation induced miR-223 expression in BM-derived macrophages (Figure 1A).	info:doi/10.1172/JCI81656#cont:87		2015	MicroRNA-223 is a crucial mediator of PPAR?-regulated alternative macrophage activation
PPARG --+> MIR223	Expression	Our findings reveal that PPAR? can promote miR-223 expression in M2 macrophages by directly binding to the PPAR? regulatory elements located in the Mir223 promoter region and that depletion of miR-223 in macrophages greatly impairs PPAR?-dependent alternative M2 macrophage activation.	info:doi/10.1172/JCI81656#cont:172		2015	MicroRNA-223 is a crucial mediator of PPAR?-regulated alternative macrophage activation
PPARG --+> MIR223	Expression	In BM-derived macrophages, miRNA-223 transcription was directly promoted by peroxisome proliferator-activated receptor? under Th2 stimuli, and Rasa1 (a member of the nuclear factors of the activated T-cells family of transcription factors), Nfat5 (a member of the GAP1 family of GTPase-activating proteins), and the proinflammatory regulator Pknox1 were identified as miRNA-223 targets.	info:doi/10.1155/2018/8530371#cont:269		2018	Crosstalk between MicroRNAs and peroxisome proliferator-activated receptors and their emerging regulatory roles in cardiovascular pathophysiology
PPARG --+> FOXA2	Regulation	Apart from insulin secretion, rosiglitazone and/or PPAR-c overexpression increase b-cell gene expression including Pdx-1, FoxA2, and BETA2/ NeuroD.	info:pmid/23372643#cont:245	23372643	2013	PPAR-? Activation Increases Insulin Secretion through the Up-regulation of the Free Fatty Acid Receptor GPR40 in Pancreatic ß-Cells
PPARG ---| PDPN	Regulation	Mechanically, oroxylin A elevated PPAR? expression, which in turn interacted with and facilitated Prox1 to undergo ubiquitinational degradation, and subsequently leads to VEGFR3, LYVE-1, and podoplanin reduction.	info:pmid/30318784#abs:11	30318784	2018	Oroxylin A inhibits Kaposi's sarcoma-associated herpes virus (KSHV) vIL-6-mediated lymphatic reprogramming of vascular endothelial cells through modulating PPAR?/Prox1 axis.
lung squamous cell carcinoma --+> XIAP	QuantitativeChange	In this study, we found that the XIAP expression was significantly increased in squamous cell lung cancer tissues compared that in cancer adjacent and normal tissues.	info:pmid/22088514#cont:226	22088514	2011	XAF1 as a prognostic biomarker and therapeutic target in squamous cell lung cancer
lung squamous cell carcinoma --+> UBE2D1	QuantitativeChange	Results showed that both lung adenocarcinoma (N = 514) and lung squamous cell carcinoma (N = 502) tissues had significantly elevated UBE2D1 RNA expression compared to the normal tissues (p < 0.001 and p = 0.036, respectively).	info:pmid/30420903#abs:3	30420903	2018	UBE2D1 RNA Expression Was an Independent Unfavorable Prognostic Indicator in Lung Adenocarcinoma, but Not in Lung Squamous Cell Carcinoma.
lung squamous cell carcinoma --+> UBE2D1	QuantitativeChange	Figure 1: UBE2D1 RNA expression was upregulated in both lung adenocarcinoma and lung squamous cell carcinoma tissues compared to normal lung tissues (a–d).	info:pmid/30420903#cont:79	30420903	2018	UBE2D1 RNA expression was an independent unfavorable prognostic indicator in lung adenocarcinoma, but not in lung squamous cell carcinoma
lung squamous cell carcinoma --+> UBE2D1	QuantitativeChange	Results showed that both lung adenocarcinoma (N = 514) and lung squamous cell carcinoma (N = 502) tissues had significantly elevated UBE2D1 RNA expression compared to the normal tissues (p <0 001 and p =0 036, respectively).	info:pmid/30420903#cont:12	30420903	2018	UBE2D1 RNA expression was an independent unfavorable prognostic indicator in lung adenocarcinoma, but not in lung squamous cell carcinoma
lung squamous cell carcinoma --+> UBE2D1	QuantitativeChange	The comparison showed that both lung adenocarcinoma (N = 514) and lung squamous cell carcinoma (N = 502) tissues had significantly elevated UBE2D1 RNA expression compared to the normal tissues (p <0 001 and p = 0 036, Figures 1(a)–1(d)).	info:pmid/30420903#cont:126	30420903	2018	UBE2D1 RNA expression was an independent unfavorable prognostic indicator in lung adenocarcinoma, but not in lung squamous cell carcinoma
PPARG ---| XIAP	Expression	In the parental HEY cell line, additional treatment with the PPAR? ligands led to an increased protein expression of DR5 and a further decline of XIAP expression.	info:pmid/20878528#abs:8	20878528	2011	Combined treatment with TRAIL and PPAR? ligands overcomes chemoresistance of ovarian cancer cell lines.
PPARG ---| XIAP	Expression	We investigated the anti-tumor effects of combined XIAP inhibition using Smac-mimetics and PPARg activation using thiazolidinediones in the granulosa cell tumors-derived cells.	info:pmid/30530769#abs:9	30530769	2018	Combined PPARg Activation and XIAP Inhibition as a Potential Therapeutic Strategy for Ovarian Granulosa Cell Tumors.
PPARG ---| XIAP	Expression		Admin imported
lung squamous cell carcinoma ---| ANGPT1	QuantitativeChange	The expression of ANGPT1 was significantly down-regulated in patients in lung squamous cell carcinoma and lung adenocarcinoma.	info:pmid/31385379#abs:9	31385379	2019	Sex-specific SNP-SNP interaction analyses within topologically associated domains reveals ANGPT1 as a novel tumor suppressor gene for lung cancer.
lung squamous cell carcinoma --+> HOXA10	QuantitativeChange	However, other studies on non-small cell lung cancer reported divergent data, and expression levels of HOXA1, HOXA5, HOXA10 and HOXC6 genes were found to be significantly increased in lung squamous cell carcinoma (Abe et al., 2006).	info:doi/10.1387/ijdb.180210yb#cont:48		2018	Lung cancer susceptibility genetic variants modulate HOXB2 expression in the lung
PPARG ---| STAT1	PromoterBinding	Peroxisome proliferator-activated receptor-? attenuates STAT-1 activation and has shown promise in renoprotection.	info:pmid/25578352#abs:4	25578352	2015	Diabetic nephropathy and proximal tubular damage.
PPARG ---| STAT1	PromoterBinding	Peroxisome proliferator-activated receptor-? inhibits Toll-like receptor3-and Toll-like receptor4-induced activation of STAT1.	info:pmid/21148557#cont:284	21148557	2011	Peroxisome proliferator-activated receptor ? negatively regulates IFN-ß production in Toll-like receptor (TLR) 3- and TLR4-stimulated macrophages by preventing interferon regulatory factor 3 binding to the IFN-ß promoter
PPARG ---| STAT1	PromoterBinding	The precise mechanisms underlying the latter effect are unclear, but it may occur via PPAR-?-mediated suppression of Stat-1 and nuclear factor-?B ( ...	info:pmid/21501066#cont:543	21501066	2011	Pioglitazone reduces secondary brain damage after experimental brain trauma by PPAR-?-independent mechanisms
PPARG ---| STAT1	PromoterBinding	Moreover, the activity of other transcription factors, for example, AP-1 and STAT-1, can be inhibited by PPAR? via direct interaction or by competition for limiting supplies of coactivators [48].	info:pmid/20871817#cont:138	20871817	2010	PPARG: Gene expression regulation and next-generation sequencing for unsolved issues
PPARG ---| STAT1	PromoterBinding	PPAR? can inhibit apoptosis and oxidative damage and counteract the activity of NF-?B, Ap-1, of the signal transducer and activator of transcription-1, and of the nuclear factor of activated T cells.33	info:pmid/21368281#cont:423	21368281	2011	Use of ibuprofen and risk of Parkinson disease
PPARG ---| STAT1	PromoterBinding	Activation of peroxisome proliferator-activated receptor? inhibits inflammatory responses by preventing the activation of nuclear transcription factors such as NF-?B, activating protein-1, and signal transducer and activator of transcription 1.	info:pmid/22275753#cont:54	22275753	2012	25-hydroxycholesterol-3-sulfate attenuates inflammatory response via PPAR? signaling in human THP-1 macrophages
PPARG ---| STAT1	PromoterBinding	Collectively, these data indicate that Peroxisome proliferator-activated receptor-? activation by troglitazone attenuates Toll-like receptor3-and -4-induced IFN-ß production and subsequent STAT1 phosphorylation and ISRE activation.	info:pmid/21148557#cont:279	21148557	2011	Peroxisome proliferator-activated receptor ? negatively regulates IFN-ß production in Toll-like receptor (TLR) 3- and TLR4-stimulated macrophages by preventing interferon regulatory factor 3 binding to the IFN-ß promoter
PPARG ---| STAT1	PromoterBinding	Peroxisome proliferator-activated receptor-? activation led to the inhibition of transcription factors, such as NF-?B, AP-1, and STAT-1 and the expression of pro-inflammatory cytokines, chemokines, cell adhesion molecules, such as ICAM-1 and MMP-9 .	info:pmid/28757373#body:130	28757373	2017	Anti-inflammatory mechanism of galangin in lipopolysaccharide-stimulated microglia: Critical role of PPAR-? signaling pathway
PPARG ---| STAT1	PromoterBinding	[18] indicated that 15-deoxy-D-prostaglandin J2 and rosiglitazone independently of PPAR? inhibit the Janus kinase signal transducer and activator of transcription inflammatory signaling by reducing the phosphorylation of signal transducer and activator of transcription1, signal transducer and activator of transcription3, Janus kinase1, and Janus kinase2.	info:pmid/24107916#cont:47	24107916	2013	PPAR? against tumors by different signaling pathways
PPARG ---| STAT1	PromoterBinding	Components of oxidized low-density lipoprotein, such as 9-HODE and 13-HODE, activate peroxisome proliferator-activated receptor gamma (PPAR-gamma), resulting in the upregulation of the major oxidized low-density lipoprotein receptor CD36.11 PPAR-gamma appears to inhibit inflammatory response genes by antagonizing the activities of AP-1, NF-kappaB, and Stat 1 transcription factors.12,13 Moreover, …	info:pmid/14752028#body:48	14752028	2004	Role of Nrf2 in the regulation of CD36 and stress protein expression in murine macrophages: activation by oxidatively modified LDL and 4-hydroxynonenal.
PPARG ---| STAT1	PromoterBinding		Admin imported
PPARG ---| STAT1	PromoterBinding	Re-Chromatin Immunoprecipitation analysis of anti-STAT1 chromatin immunocomplexes further showed that peroxisome proliferator-activated receptor? and p300 bind to the CD36 promoter along with STAT1 (Fig. 7A).	info:doi/10.1074/jbc.M115.686865#cont:980		2015	Reactive Oxygen Species (ROS) mediate p300-dependent STAT1 Protein Interaction with Peroxisome Proliferatoractivated Receptor (PPAR)-? in CD36 protein expression and foam cell formation
PPARG ---| STAT1	PromoterBinding	Activation of Peroxisome proliferator-activated receptora and Peroxisome proliferator-activated receptor? inhibits inflammatory responses by preventing the activation of nuclear transcription factors, NF-kB, AP-1, and STAT1/3 (112,114).	info:pui/366085565#cont:278		2012	Nox enzymes and Oxidative stress in atherosclerosis
PPARG --+> CYP2A6	PromoterBinding	Taken together, Ppar-? was a transcriptional activator of Cyp2a5, and its rhythmic expression contributed to circadian expression of Cyp2a5.	info:pmid/30154104#abs:11	30154104	2018	Circadian Regulation of Hepatic Cytochrome P450 2a5 by Peroxisome Proliferator-Activated Receptor ?.
PPARG --+> CYP2A6	PromoterBinding	In addition, a combination of promoter truncation analysis, mobility shift, and chromatin immunoprecipitation assays revealed that Ppar-? directly bound to a PPAR response element (i.e., the -1418- to -1396-bp region) within Cyp2a5 promoter and activated the gene transcription.	info:pmid/30154104#abs:10	30154104	2018	Circadian Regulation of Hepatic Cytochrome P450 2a5 by Peroxisome Proliferator-Activated Receptor ?.
PPARG --+> CYP2A6	PromoterBinding	(A) Ppar-g binds to Cyp2a5 promoter (B-site).	info:pmid/30154104#cont:316	30154104	2018	Circadian regulation of hepatic cytochrome P450 2a5 by peroxisome proliferator-activated receptor ?
PPARG --+> CYP2A6	PromoterBinding	The results suggested that Ppar-g protein can bind to the B-site of Cyp2a5 promoter.	info:pmid/30154104#cont:279	30154104	2018	Circadian regulation of hepatic cytochrome P450 2a5 by peroxisome proliferator-activated receptor ?
PPARG --+> CYP2A6	PromoterBinding	Taken together, Ppar-g was a transcriptional activator of Cyp2a5, and its rhythmic expression contributed to circadian expression of Cyp2a5.	info:pmid/30154104#cont:11	30154104	2018	Circadian regulation of hepatic cytochrome P450 2a5 by peroxisome proliferator-activated receptor ?
PPARG --+> CYP2A6	PromoterBinding	Taken together, Ppar-g was a transcriptional activator of Cyp2a5, and its rhythmic expression contributed to circadian expression of Cyp2a5.	info:pmid/30154104#cont:339	30154104	2018	Circadian regulation of hepatic cytochrome P450 2a5 by peroxisome proliferator-activated receptor ?
PPARG --+> CYP2A6	PromoterBinding	Taken together, our data indicated that Ppar-g transcriptionally activated Cyp2a5 expression via direct binding to the -1418-to -1396-bp region (B-site).	info:pmid/30154104#cont:299	30154104	2018	Circadian regulation of hepatic cytochrome P450 2a5 by peroxisome proliferator-activated receptor ?
PPARG --+> CYP2A6	PromoterBinding	Second, use of rosiglitazone and overexpression of Ppar-g consistently induced the promoter activity of Cyp2a5 in luciferase reporter assays (Fig. 7).	info:pmid/30154104#cont:305	30154104	2018	Circadian regulation of hepatic cytochrome P450 2a5 by peroxisome proliferator-activated receptor ?
PPARG --+> CYP2A6	PromoterBinding	Further, Ppar-g activation upregulated Cyp2a5 expression in Hepa-1c1c7 cells, whereas Ppar-g knockdown downregulated Cyp2a5 expression.	info:pmid/30154104#cont:336	30154104	2018	Circadian regulation of hepatic cytochrome P450 2a5 by peroxisome proliferator-activated receptor ?
PPARG --+> CYP2A6	PromoterBinding	The Ppar-g agonist rosiglitazone dose-dependently enhanced the promoter activity of Cyp2a5, suggesting a positive role of Ppar-g in transcriptional regulation of Cyp2a5 (Fig. 7A).	info:pmid/30154104#cont:257	30154104	2018	Circadian regulation of hepatic cytochrome P450 2a5 by peroxisome proliferator-activated receptor ?
PPARG --+> CYP2A6	PromoterBinding	Furthermore, Ppar-g activation (by a selective agonist, rosiglitazone) upregulated Cyp2a5 expression in Hepa-1c1c7 cells, whereas Ppar-g knockdown downregulated Cyp2a5 expression.	info:pmid/30154104#cont:8	30154104	2018	Circadian regulation of hepatic cytochrome P450 2a5 by peroxisome proliferator-activated receptor ?
PPARG --+> CYP2A6	PromoterBinding	First, Ppar-g activation by the selective agonist rosiglitazone upregulated Cyp2a5 expression in Hepa-1c1c7 cells, whereas Ppar-g knockdown downregulated Cyp2a5 expression (Figs. 4 and 5).	info:pmid/30154104#cont:304	30154104	2018	Circadian regulation of hepatic cytochrome P450 2a5 by peroxisome proliferator-activated receptor ?
PPARG --+> CYP2A6	PromoterBinding	In addition, a combination of promoter truncation analysis, mobility shift, and chromatin immunoprecipitation assays revealed that Ppar-g directly bound to a PPAR response element (i.e., the 21418-to 21396-bp region) within Cyp2a5 promoter and activated the gene transcription.	info:pmid/30154104#cont:10	30154104	2018	Circadian regulation of hepatic cytochrome P450 2a5 by peroxisome proliferator-activated receptor ?
lung squamous cell carcinoma ---| MIR223	QuantitativeChange	RT-PCR results showed that the miR-223-3p expression was down-regulated in the Lung squamous cell carcinoma tissues compared with that in the normal lung tissues (Fig. 1b).	info:doi/10.1186/s13046-019-1079-1#cont:169		2019	MiR-223-3p functions as a tumor suppressor in lung squamous cell carcinoma by miR-223-3p-mutant p53 regulatory feedback loop
lung squamous cell carcinoma ---| MIR223	QuantitativeChange	To sum up, our results showed that miR-223-3p expression was down-regulated in the Lung squamous cell carcinoma tissues compared to that in the adjacent normal lung tissues, especially in Lung squamous cell carcinoma tissues with the ability to form xenografts.	info:doi/10.1186/s13046-019-1079-1#cont:308		2019	MiR-223-3p functions as a tumor suppressor in lung squamous cell carcinoma by miR-223-3p-mutant p53 regulatory feedback loop
PPARG ---| SKP2	Expression	In addition, PPAR? overexpression can down-regulate the expression of Skp2 mRNA and protein in breast cancer cells.	info:pmid/20734220#abs:7	20734220	2010	Overexpression of PPAR? can down-regulate Skp2 expression in MDA-MB-231 breast tumor cells.
PPARG ---| SKP2	Expression	Inhibition of PPAR-? by GW9662 restored the suppression of activated PPAR-? on phosphorylation of AKT and subsequent skp2 production.	info:pmid/27373852#abs:7	27373852	2016	Activation of PPAR-? inhibits PDGF-induced proliferation of mouse renal fibroblasts.
PPARG ---| SKP2	Expression	Overexpression of PPAR? can down-regulate Skp2 expression in MDA-MB-231 breast tumor cells.	info:pmid/20734220#title:1	20734220	2010	Overexpression of PPAR? can down-regulate Skp2 expression in MDA-MB-231 breast tumor cells.
PPARG ---| SKP2	Expression	Fig. 4 Overexpression Peroxisome proliferator-activated receptor? can downregulate the expression of Skp2 mRNA and protein.	info:pmid/20734220#cont:242	20734220	2010	Overexpression of PPAR? can down-regulate Skp2 expression in MDA-MB-231 breast tumor cells
PPARG ---| SKP2	Expression	Overexpression of Peroxisome proliferator-activated receptor? can down-regulate the expression of Skp2 mRNA and protein	info:pmid/20734220#cont:211	20734220	2010	Overexpression of PPAR? can down-regulate Skp2 expression in MDA-MB-231 breast tumor cells
PPARG ---| SKP2	Expression	Additional studies will delineate the molecular pathways which Peroxisome proliferator-activated receptor? participates in the regulation of Skp2 expression.	info:pmid/20734220#cont:298	20734220	2010	Overexpression of PPAR? can down-regulate Skp2 expression in MDA-MB-231 breast tumor cells
PPARG ---| SKP2	Expression	Peroxisome proliferator-activated receptor? knockdown abolished troglitazone-induced down-regulation of Skp2 protein (Fig. 3c, d).	info:pmid/20734220#cont:209	20734220	2010	Overexpression of PPAR? can down-regulate Skp2 expression in MDA-MB-231 breast tumor cells
PPARG ---| SKP2	Expression	Peroxisome proliferator-activated receptor? knockdown abolished troglitazone-induced down-regulation of Skp2 protein (Fig. 3c, d).	info:pmid/20734220#cont:258	20734220	2010	Overexpression of PPAR? can down-regulate Skp2 expression in MDA-MB-231 breast tumor cells
PPARG ---| SKP2	Expression	Additionally, over-expression of PPAR? (peroxisome proliferators activated receptor gamma) can down-regulate Skp2 expression in breast tumor cells .	info:pmid/21963805#body:60	21963805	2012	Skp2: A novel potential therapeutic target for prostate cancer
PPARG ---| SKP2	Expression	Previous studies have shown that several mediators, including ERK1/2, E2F1, Akt, PPAR?, FOXP3 and STAT3, regulate Skp2 expression at the transcriptional level.35,46–50	info:pmid/28230855#cont:242	28230855	2017	Simvastatin-induced cell cycle arrest through inhibition of STAT3/SKP2 axis and activation of AMPK to promote p27 and p21 accumulation in hepatocellular carcinoma cells
PPARG ---| SKP2	Expression	Accordingly, western blotting also showed that overexpression of Peroxisome proliferator-activated receptor? can down-regulate Skp2 expression after troglitazone treatment (Fig. 4, lower panel).	info:pmid/20734220#cont:220	20734220	2010	Overexpression of PPAR? can down-regulate Skp2 expression in MDA-MB-231 breast tumor cells
PPARG ---| SKP2	Expression	Inhibition of PPAR-? by GW9662 reversed the suppression effects of rosiglitazone or AdPPAR-?, implying that activation of PPAR-? attenuates renal fibroblasts proliferation by suppressing AKT phosphorylation and skp2 production.	info:pmid/27373852#body:88	27373852	2016	Activation of PPAR-? inhibits PDGF-induced proliferation of mouse renal fibroblasts
PPARG ---| SKP2	Expression	These results showed that Skp2 is partially involved in Peroxisome proliferator-activated receptor?-mediated anti-proliferative and pro-apoptotic abilities, suggesting that Peroxisome proliferator-activated receptor? regulates tumor progression through down-regulation of Skp2 expression in breast cancer.	info:pmid/20734220#cont:296	20734220	2010	Overexpression of PPAR? can down-regulate Skp2 expression in MDA-MB-231 breast tumor cells
PPARG ---| SKP2	Expression		Admin imported
PPARG ---| SKP2	Expression	PPAR? is a critical negative regulator for Skp2 expression, evidenced by the inverse correlation of PPAR? and Skp2 in human breast cancer specimen [ ].	info:doi/10.1016/j.semcancer.2020.01.013#body:329		2020	The Skp2 Pathway: A Critical Target for Cancer Therapy
lung squamous cell carcinoma --+> STAT1	QuantitativeChange	In Hou Lung database [24], mRNA expressions of STAT1/2/5B were found to be significantly up-regulated in lung squamous cell carcinoma tissues compared to normal samples, whereas STAT3/5A/6 expression levels in lung squamous cell carcinoma tissues were lower (Figure 3).	info:embase/20190843784#cont:76		2019	Expression profile and prognostic values of STAT family members in non-small cell lung cancer

## Sheet: LSCC_prognostic netowrk
Relation	Status	Type	Sentence	TextRef	PMID	PubYear	Title
TNF --+> lung squamous cell carcinoma		Regulation	(E) Immunoblots of different polyubiquitin chains in whole-cell lysates from untreated (no exogenous stimulation) or TNFa-stimulated Lung squamous cell carcinoma and adenocarcinoma and Lung squamous cell carcinoma cells from KF mice.	info:doi/10.1084/jem.20180742#cont:282		2019	LUBAC determines chemotherapy resistance in squamous cell lung cancer
PPARG --+> STK11		Regulation	Simultaneously, we found that knocking down PPAR? in BV2 microglial cells also activated LKB1-AMPK signaling and inhibited NF?B-IKKß activation, which are similar to the effects of antagonizing PPAR?.	info:pmid/29740932#abs:8	29740932	2018	Antagonizing peroxisome proliferator-activated receptor ? facilitates M1-to-M2 shift of microglia by enhancing autophagy via the LKB1-AMPK signaling pathway.
PPARG --+> STK11		Regulation	rosiglitazone significantly increases the release of adiponectin, presumably acting through peroxisome proliferator-activated receptor gamma [17] which activates LKB1-AMP-activated protein kinase, leading to stimulation of glucose utilization	info:pmid/21373642#cont:320	21373642	2011	Activation of peroxisome proliferator-activated receptor gamma by rosiglitazone increases Sirt6 expression and ameliorates hepatic steatosis in rats
PPARG --+> STK11		Regulation	rosiglitazone likely acts through the peroxisome proliferator-activated receptor gamma-induced increase in adiponectin and the subsequent elevation of LKB1-AMP-activated protein kinase activity as well as PPARa via adiponectin receptor 1 (Adipor1) and Adipor2, respectively.	info:pmid/21373642#cont:338	21373642	2011	Activation of peroxisome proliferator-activated receptor gamma by rosiglitazone increases Sirt6 expression and ameliorates hepatic steatosis in rats
PPARG ---| ACE		MolTransport	PPAR? agonists downregulate the WNT/ß-catenin pathway and inhibit the secretion of angiotensinogen, ACE and AT1 receptors, but stimulate the production of renin.	info:pmid/29884931#cont:192	29884931	2017	Interplay between the renin-angiotensin system, the canonical WNT/ß-catenin pathway and PPAR? in hypertension
PPARG ---| ACE		MolTransport	PPAR? agonists can reduce hypertension, vasoconstriction and aldosterone secretion through the inhibition of angiotensinogen, ACE, AT1, reactive oxygen species and inflammatory factors even if they stimulate the production of renin.	info:pmid/29884931#cont:213	29884931	2017	Interplay between the renin-angiotensin system, the canonical WNT/ß-catenin pathway and PPAR? in hypertension
ACE --+> lung squamous cell carcinoma		Regulation	The DD genotype of angiotensin-converting enzyme leads to an increased risk of squamous cell lung carcinoma118.	info:pmid/27775788#cont:457	27775788	2016	Local bone marrow renin-angiotensin system in the genesis of leukemia and other malignancies
PPARG ---| ACE		Expression	Typical PPARgamma agonists suppress the gene expression of angiotensin-converting enzyme (ACE) in vascular tissues.	info:pmid/18344629#abs:2	18344629	2007	Inhibition of vascular angiotensin-converting enzyme by telmisartan via the peroxisome proliferator-activated receptor gamma agonistic property in rats.
PPARG ---| ACE		Expression	Treatment with PPAR? agonist, as well as ACE inhibitor comparably affected renal expression of the renin-angiotensin system components, normalizing increased renal expression of ACE and enhancing the expression of Mas receptor.	info:pmid/24582928#abs:6	24582928	2014	Pioglitazone, a PPAR? agonist, provides comparable protection to angiotensin converting enzyme inhibitor ramipril against adriamycin nephropathy in rat.
PPARG ---| ACE		Expression	PPARalpha and PPARgamma modulate the renin-angiotensin-aldosterone system , a major regulator of systemic blood pressure and interstitial fluid volume by transcriptional control of renin, angiotensinogen, angiotensin converting enzyme (ACE) and angiotensin II receptor 1 .	info:pmid/20613959#abs:2	20613959	2010	PPARs in the Renal Regulation of Systemic Blood Pressure.
PPARG ---| ACE		Expression	(b) PPAR? agonists induced renin, but reduced ACE mRNA expressions.	info:pmid/26999660#cont:220	26999660	2016	Effects of combination PPAR? agonist and angiotensin receptor blocker on glomerulosclerosis
PPARG ---| ACE		Expression	Inhibition of vascular angiotensin-converting enzyme by telmisartan via the peroxisome proliferator-activated receptor gamma agonistic property in rats.	info:pmid/18344629#title:1	18344629	2007	Inhibition of vascular angiotensin-converting enzyme by telmisartan via the peroxisome proliferator-activated receptor gamma agonistic property in rats.
PPARG ---| ACE		Expression	Inhibition of vascular angiotensin-converting enzyme by telmisartan via the peroxisome proliferator-activated receptor gamma agonistic property in rats.	info:pmid/29884931#cont:730	29884931	2017	Interplay between the renin-angiotensin system, the canonical WNT/ß-catenin pathway and PPAR? in hypertension
PPARG ---| ACE		Expression	Moreover, in warm hepatic ischemia, Peroxisome proliferator-activated receptor? upregulation was a key mechanism of the benefits of pharmacological blockers of angiotensin II (angiotensin-converting-enzyme (ACE) inhibitors and Ang II receptor antagonists) on steatotic livers [36].	info:pmid/22675337#cont:123	22675337	2012	The current knowledge of the role of PPAR in hepatic ischemia-reperfusion injury
PPARG ---| ACE		Expression	Our study also points to the relevance of peroxisome proliferator-activated receptor? modulating AT1R, ACE expression, and angiotensin II level, actions that bring relevant consequences for vascular tone and blood pressure.	info:doi/10.1155/2019/1371758#cont:499		2019	Rosiglitazone, a Ligand to PPAR ?, Improves Blood Pressure and Vascular Function through Renin-Angiotensin System Regulation
PPARG ---| ACE		Expression	These data indicate that 11beta-HSD1 reactivates 11-DHB at the prereceptor level to stimulate glucocorticoid receptor and augment the ACE gene expression, and that PPAR-gamma agonists regulate the 11beta-HSD1 gene expression and thus the glucocorticoid receptor-mediated ACE gene expression in cardiac fibroblasts.	info:doi/10.1016/j.cardfail.2006.08.104#body:8		2006	PPAR-gamma Agonist Suppresses 11beta-hydroxysteroid Dehydrogenase Type 1 Expression and Alleviates Glucocorticoid-induced ACE Gene Expression in Cardiac Fibroblasts
PPARG ---| TNF		PromoterBinding	Meanwhile, the levels of ADP and TNF-a may be mediated through the activation of PPAR?.	info:pmid/21418994	21418994	2011	[Effects of soluble epoxide hydrolase inhibitors on lipid metabolism and secretive functions of adipocytes].
PPARG ---| TNF		PromoterBinding	Meanwhile, the levels of ADP and TNF-a may be mediated through the activation of PPAR?.	info:pmid/21418994#abs:14	21418994	2011	[Effects of soluble epoxide hydrolase inhibitors on lipid metabolism and secretive functions of adipocytes].
PPARG ---| TNF		PromoterBinding	In these cells, we observed PPARgamma-dependent inhibition of nuclear factor-kappaB activation and TNF-alpha expression in response to PMA.	info:pmid/17325208	17325208	2007	PPARgamma1 attenuates cytosol to membrane translocation of PKCalpha to desensitize monocytes/macrophages.
PPARG ---| TNF		PromoterBinding	In these cells, we observed PPARgamma-dependent inhibition of nuclear factor-kappaB activation and TNF-alpha expression in response to PMA.	info:pmid/17325208#abs:3	17325208	2007	PPARgamma1 attenuates cytosol to membrane translocation of PKCalpha to desensitize monocytes/macrophages.
PPARG ---| TNF		PromoterBinding	peroxisome proliferator-activated receptor? knockdown also increased the peptidoglycan-induced inflammatory cytokines (TNF-a, IL-1ß, IL-12p40) production.	info:pmid/22925536#abs:8	22925536	2012	Peptidoglycan induced expression of peroxisome proliferator-activated receptor ? in mouse peritoneal macrophages: role of ERK and JNK MAP kinases.
PPARG ---| TNF		PromoterBinding	Ligands of PPARgamma, 15-deoxy-delta(12,14)prostaglandin J2, and troglitazone significantly decreased LPS-induced tumor necrosis factor-alpha production by AMs.	info:pmid/14563653#abs:7
PPARG ---| TNF		PromoterBinding	PPAR alpha and PPAR gamma activators may inhibit cardiac TNFalpha expression but not accompanied by change of PPAR alpha or PPAR gamma mRNA expression.	info:pmid/15669179#abs:8
PPARG ---| TNF		PromoterBinding	Finally, PPARgamma knockdown in human macrophages enhances TNF production and controls the intracellular growth of M. tuberculosis.	info:pmid/20554962#abs:8		2010
PPARG ---| TNF		PromoterBinding	Anti-IgE-induced expression of cytokine mRNA, such as TNF-alpha, IL-5 and macrophage inflammatory protein-1alpha mRNA, was also reduced by the treatment with these PPARgamma agonists.	info:pmid/11093153#abs:9
PPARG ---| TNF		PromoterBinding	Moreover, PPARgamma activation suppressed hepatic lipoperoxide and reduced hepatic pro-inflammatory cytokines (TNF-alpha and IL-6) production.	info:pmid/20376096#abs:9		2010
PPARG ---| TNF		PromoterBinding	In BV-2 cells subjected to hypoxia, T33 (0.5 µmol/L) reduced TNF-a, COX-2, and p-P38 production, which was antagonized by pre-administration of the specific PPAR? antagonist GW9662 (30 µmol/L).	info:pmid/21804572#abs:10		2011	T33, a novel peroxisome proliferator-activated receptor ?/a agonist, exerts neuroprotective action via its anti-inflammatory activities.
PPARG ---| TNF		PromoterBinding	The PPARgamma agonist rosiglitazone stimulated both adiponectin and leptin expression and inhibited the expression of IL-6, MCP-1 and TNFalpha; MCP-1 secretion was reduced.	info:pmid/20473515#abs:10		2010
PPARG ---| TNF		PromoterBinding	In addition, PPAR? agonist accelerated wound healing and reduced local TNF-a expression and wound apoptotic cells accumulation in wild type but not PPAR?-KO mice.	info:pmid/25590807#abs:10	25590807	2015	Macrophage peroxisome proliferator-activated receptor ? deficiency delays skin wound healing through impairing apoptotic cell clearance in mice.
PPARG ---| TNF		PromoterBinding	Activation of PPAR? in the donor suppresses expressions of proinflammatory cytokines including tumor necrosis factor-a (TNF-a) and inducible nitric oxide synthase (iNOS) in transplanted islets.	info:pmid/22469179#abs:7	22469179	2012	Activation of peroxisome proliferator-activated receptor ? prolongs islet allograft survival.
PPARG ---| TNF		PromoterBinding	Recently, PPAR? agonists have been shown to inhibit the production of cytokines including TNF-a, IL-1ß and IL-6 in a variety of animal models of central nervous system diseases ( ).	info:pmid/18455351	18455351	2008	Peroxisome proliferator-activated receptor gamma agonist, rosiglitazone, suppresses CD40 expression and attenuates inflammatory responses after lithium pilocarpine-induced status epilepticus in rats
PPARG ---| TNF		PromoterBinding	In conclusion, TNF-a induced CLDN1 expression is regulated by the PKCd-iPLA2-PGE2-PPAR? signaling cascade in human lung carcinoma A549 cells.	info:pmid/25562426#abs:9	25562426	2015	PKCd-iPLA2-PGE2-PPAR? signaling cascade mediates TNF-a induced Claudin 1 expression in human lung carcinoma cells.
PPARG ---| TNF		PromoterBinding	Direct activation of PPAR? leads to contribution of lowering triglyceride and free fatty acid levels, and suppresses TNF-a gene expression, which is potential systemic mediators of insulin resistance ( ).	info:pmid/16095853	16095853	2005	Euonymus alatus prevents the hyperglycemia and hyperlipidemia induced by high-fat diet in ICR mice
PPARG ---| TNF		PromoterBinding	For instance, PPAR-? activation increases fat accumulation in adipocytes, thereby increasing adiponectin and decreasing resistin and TNF-a expression, which enhance insulin sensibility .	info:pmid/19864106	19864106	2010	Glycine regulates inflammatory markers modifying the energetic balance through PPAR and UCP-2
PPARG ---| TNF		PromoterBinding	These combined data are consistent with the hypothesis that PPAR? stimulates MUC1/Muc1 expression, thereby blocking PMA/Pseudomonas aeruginosa strain K-induced TNF-a/IL-8 production by airway epithelial cells.	info:pmid/22268120#abs:9	22268120	2012	PPAR? inhibits airway epithelial cell inflammatory response through a MUC1-dependent mechanism.
PPARG ---| TNF		PromoterBinding	Importantly, PPARgamma agonists troglitazone, rosiglitazone, and 15-deoxy-delta(12, 14)-prosglandin J2 significantly decreased the up expression of TNF-alpha and IL-6 in HMCL supernatants stimulated by IL-1beta.	info:pmid/15526907#abs:6
PPARG ---| TNF		PromoterBinding	Furthermore, a specific PPARgamma antagonist T0070907 abrogated the inhibitory action of capsaicin on LPS-induced TNFalpha production by RAW 264.7 cells, indicating that capsaicin acts like a ligand for PPARgamma.	info:pmid/15304360#abs:7
PPARG ---| TNF		PromoterBinding	The expression of TNF-a and NF-?B measured by immunohistochemistry was significantly reduced by GPs in a dose-dependent manner, and the expression of PPAR? and CYP4501A1 mRNA, as measured using quantitative real-time PCR, were significantly down-regulated by GPs.	info:pmid/25717238#abs:8	25717238	2015	Mechanism of action of gypenosides on type 2 diabetes and non-alcoholic fatty liver disease in rats.
PPARG ---| TNF		PromoterBinding	These assays indicated that PPAR? and liver X receptors were both recruited to the inos, il1ß, and tnfa promoters in a ligand-dependent manner ( A), suggesting that the SUMOylated receptors are interrupting distinct signaling inputs that are responsible for NCoR clearance.	info:pmid/17218271	17218271	2007	Parallel SUMOylation-Dependent Pathways Mediate Gene- and Signal-Specific Transrepression by LXRs and PPAR?
PPARG ---| TNF		PromoterBinding	Resistin and TNF-a expression, both of which induce insulin resistance, are reduced by peroxisome proliferator-activated receptor gamma ligands, suggesting that the insulin-sensitizing effects of peroxisome proliferator-activated receptor gamma agonists are related to their anti-inflammatory properties .	info:pmid/16959586	16959586	2006	Peroxisome Proliferator-Activated Receptor Gamma Agonists: Their Role as Vasoprotective Agents in Diabetes
PPARG ---| TNF		PromoterBinding	Similarly, after stimulation with apoptotic cells, Peroxisome proliferator-activated receptor? sumoylation prevented LPS-induced clearance of nuclear receptor co-repressor from the NF?B site within TNF-a promoter in murine macrophages ( ).	info:pmid/20627123	20627123	2010	Emerging roles of SUMO modification in arthritis
PPARG ---| TNF		PromoterBinding	In real-time reverse transcription polymerase chain reaction analysis, the messenger ribonucleic acid expression levels of interleukin-1ß (IL-1ß), IL-6, IL-8, monocyte chemoattractant protein-1, tumor necrosis factor-a, transforming growth factor beta 1, and vascular endothelial growth factor-A were decreased in the PPAR? group compared to the vehicle group in the early periods of corneal inflamm…	info:pmid/24194635#abs:9	24194635	2013	An ophthalmic solution of a peroxisome proliferator-activated receptor gamma agonist prevents corneal inflammation in a rat alkali burn model.
PPARG ---| TNF		PromoterBinding	In primary cultured rat Kupffer cells, peroxisome proliferator-activated receptor? and RXR agonists caused inhibition of lipopolysaccharide-induced production of nitric oxide and TNFa, suggesting that peroxisome proliferator-activated receptor?/RXR ligands might be useful in treatment of hepatic injury associated with endotoxic shock ( ).	info:pmid/15236764	15236764	2004	Circulating adiponectin levels increase in rats on caloric restriction: the potential for insulin sensitization
PPARG ---| TNF		PromoterBinding	However, these studies demonstrate that stable over-expression of PPARß/d or PPAR? significantly increases the efficacy of ligand activation and represses UVB-induced expression of tumor necrosis factor a (TNFa), interleukin 6 (IL6), or IL8 in HaCaT keratinocytes, thereby establishing an excellent model to study the functional role of these receptors in human keratinocytes.	info:pmid/21843636#abs:7	21843636	2011	Stable over-expression of PPARß/d and PPAR? to examine receptor signaling in human HaCaT keratinocytes.
PPARG ---| TNF		PromoterBinding	Notably, overexpression of PPAR? in RAW264.7 cells abrogated the oxygen-glucose deprivation/reperfusion-induced expression of iNOS, TNF-a and IFN-?.	info:pmid/27633957#cont:114	27633957	2016	Involvement of peroxisome proliferator activated receptor in the anti-inflammatory effects of atorvastatin in oxygen-glucose deprivation/reperfusion-stimulated RAW264.7 murine macrophages
PPARG ---| TNF		PromoterBinding	This study also demonstrated that the PPAR? agonists inhibited the ß-amyloid induced stimulation of IL-6 and TNFa expression.	info:pmid/11755002#body:138	11755002	2001	Anti-inflammatory actions of peroxisome proliferator-activated receptor gamma agonists in Alzheimer's disease
PPARG ---| TNF		PromoterBinding	This study also demonstrated that the PPAR? agonists inhibited the ß-amyloid induced stimulation of IL-6 and TNFa expression.	info:pmid/11755002	11755002	2001	Anti-inflammatory actions of peroxisome proliferator-activated receptor gamma agonists in Alzheimer's disease
PPARG ---| TNF		PromoterBinding	Overexpression of PPAR? abrogated the oxygen-glucose deprivation/reperfusion-induced alterations of iNOS, TNF-a, IFN-? and CD206 expression levels.	info:pmid/27633957#cont:180	27633957	2016	Involvement of peroxisome proliferator activated receptor in the anti-inflammatory effects of atorvastatin in oxygen-glucose deprivation/reperfusion-stimulated RAW264.7 murine macrophages
PPARG ---| TNF		PromoterBinding	PKCd-iPLA2-PGE2-PPAR? signaling cascade mediates TNF-a induced Claudin 1 expression in human lung carcinoma cells.	info:pmid/25562426#title:1	25562426	2015	PKCd-iPLA2-PGE2-PPAR? signaling cascade mediates TNF-a induced Claudin 1 expression in human lung carcinoma cells.
PPARG ---| TNF		PromoterBinding	Indeed, there is evidence showing PPARg-dependent inhibition of the production of cytokines such as IL-1b, IL-6, IL-8, IL-10 and TNFa in	info:pmid/26339984#cont:187	26339984	2015	Peroxisome proliferator-activated receptors in the regulation of female reproductive functions
PPARG ---| TNF		PromoterBinding	We have previously found that activation of PPAR ? by conjugated linoleic acid decreases colonic tumor necrosis factor- a expression by blocking nuclear factor- ?B activity.	info:pmid/16698153#body:119	16698153	2006	CLA and n-3 PUFA differentially modulate clinical activity and colonic PPAR-responsive gene expression in a pig model of experimental IBD
PPARG ---| TNF		PromoterBinding	We have previously found that activation of PPAR ? by conjugated linoleic acid decreases colonic tumor necrosis factor- a expression by blocking nuclear factor- ?B activity.	info:pmid/16698153	16698153	2006	CLA and n-3 PUFA differentially modulate clinical activity and colonic PPAR-responsive gene expression in a pig model of experimental IBD
PPARG ---| TNF		PromoterBinding	PPAR? overexpression decreased the expression of iNOS, TNF-a and IFN-?, and increased the expression of CD206 at the protein level compared with model cells.	info:pmid/27633957#cont:123	27633957	2016	Involvement of peroxisome proliferator activated receptor in the anti-inflammatory effects of atorvastatin in oxygen-glucose deprivation/reperfusion-stimulated RAW264.7 murine macrophages
PPARG ---| TNF		PromoterBinding	In the present study, PPAR? was demonstrated to regulate oxygen-glucose deprivation/reperfusion-induced alterations in the expression levels of iNOS, CD206, TNFa and IFN?.	info:pmid/27633957#cont:193	27633957	2016	Involvement of peroxisome proliferator activated receptor in the anti-inflammatory effects of atorvastatin in oxygen-glucose deprivation/reperfusion-stimulated RAW264.7 murine macrophages
PPARG ---| TNF		PromoterBinding	PPAR?-agonists-thiazolidinediones have been reported to reduce expression of the interleukins IL-3, IL-4, IL-5 and IL-8 as well as TNFa in inflamed tissues ( ).	info:pmid/21645960#body:351	21645960	2011	PPAR?: A molecular link between systemic metabolic disease and benign prostate hyperplasia
PPARG ---| TNF		PromoterBinding	PPAR?-agonists-thiazolidinediones have been reported to reduce expression of the interleukins IL-3, IL-4, IL-5 and IL-8 as well as TNFa in inflamed tissues ( ).	info:pmid/21645960	21645960	2011	PPAR?: A molecular link between systemic metabolic disease and benign prostate hyperplasia
PPARG ---| TNF		PromoterBinding	PPAR? overexpression significantly decreased the expression of iNOS, TNF-a and IFN-?, and significantly increased the expression of CD206 at the mRNA level compared with model cells.	info:pmid/27633957#cont:106	27633957	2016	Involvement of peroxisome proliferator activated receptor in the anti-inflammatory effects of atorvastatin in oxygen-glucose deprivation/reperfusion-stimulated RAW264.7 murine macrophages
PPARG ---| TNF		PromoterBinding	Recently, PPAR? agonists have been shown to inhibit the production of cytokines including TNF-a, IL-1ß and IL-6 in a variety of animal models of central nervous system diseases ( ).	info:pmid/18455351#body:18	18455351	2008	Peroxisome proliferator-activated receptor gamma agonist, rosiglitazone, suppresses CD40 expression and attenuates inflammatory responses after lithium pilocarpine-induced status epilepticus in rats
PPARG ---| TNF		PromoterBinding	Direct activation of PPAR? leads to contribution of lowering triglyceride and free fatty acid levels, and suppresses TNF-a gene expression, which is potential systemic mediators of insulin resistance ( ).	info:pmid/16095853#body:158	16095853	2005	Euonymus alatus prevents the hyperglycemia and hyperlipidemia induced by high-fat diet in ICR mice
PPARG ---| TNF		PromoterBinding	For instance, peroxisome proliferator-activated receptor? agonists inhibit the expression and/or secretion of tumour necrosis factor a (TNFa) and plasminogen activator inhibitor 1 (PAI1), both of which promote insulin resistance ( ).	info:pmid/19772894	19772894	2010	PPARs and adipocyte function
PPARG ---| TNF		PromoterBinding	For instance, peroxisome proliferator-activated receptor? agonists inhibit the expression and/or secretion of tumour necrosis factor a (TNFa) and plasminogen activator inhibitor 1 (PAI1), both of which promote insulin resistance ( ).	info:pmid/19772894#body:129	19772894	2010	PPARs and adipocyte function
PPARG ---| TNF		PromoterBinding	For instance, PPAR-? activation increases fat accumulation in adipocytes, thereby increasing adiponectin and decreasing resistin and TNF-a expression, which enhance insulin sensibility .	info:pmid/19864106#body:8	19864106	2010	Glycine regulates inflammatory markers modifying the energetic balance through PPAR and UCP-2
PPARG ---| TNF		PromoterBinding	Activation of peroxisomal proliferator-activated receptor? reduces production of cytokines, such as TNFa, interleukin-6, and monocyte chemoattractant protein-1, and reduces accumulation of inflammatory macrophages (55).	info:pmid/26797396#cont:765	26797396	2016	Pioglitazone attenuates hepatic inflammation and fibrosis in phosphatidylethanolamine N-methyltransferase-deficient mice
PPARG ---| TNF		PromoterBinding	These assays indicated that PPAR? and liver X receptors were both recruited to the inos, il1ß, and tnfa promoters in a ligand-dependent manner ( A), suggesting that the SUMOylated receptors are interrupting distinct signaling inputs that are responsible for NCoR clearance.	info:pmid/17218271#body:95	17218271	2007	Parallel SUMOylation-Dependent Pathways Mediate Gene- and Signal-Specific Transrepression by LXRs and PPAR?
PPARG ---| TNF		PromoterBinding	The results of the present study demonstrate that overexpres-sion of PPAR? attenuates the oxygen-glucose deprivation/reperfusion-induced upregulation of iNOS, TNF-a and IFN-? expression, and the downregulation of CD206 expression in RAW264.7 murine macrophages.	info:pmid/27633957#cont:170	27633957	2016	Involvement of peroxisome proliferator activated receptor in the anti-inflammatory effects of atorvastatin in oxygen-glucose deprivation/reperfusion-stimulated RAW264.7 murine macrophages
PPARG ---| TNF		PromoterBinding	Since several studies have shown that PPAR-? stimulation inhibits TNF-a production, we evaluated the effect of rosiglitazone on TNF-a levels in microglial cells to ascertain its involvement in the mechanism of PPAR-?-mediated neuroprotection in Parkinson's disease.	info:pmid/21839812	21839812	2011	Rosiglitazone decreases peroxisome proliferator receptor-gamma levels in microglia and inhibits TNF-alpha production: new evidences on neuroprotection in a progressive Parkinson's disease model
PPARG ---| TNF		PromoterBinding	Since several studies have shown that PPAR-? stimulation inhibits TNF-a production, we evaluated the effect of rosiglitazone on TNF-a levels in microglial cells to ascertain its involvement in the mechanism of PPAR-?-mediated neuroprotection in Parkinson's disease.	info:pmid/21839812#body:93	21839812	2011	Rosiglitazone decreases peroxisome proliferator receptor-gamma levels in microglia and inhibits TNF-alpha production: new evidences on neuroprotection in a progressive Parkinson's disease model
PPARG ---| TNF		PromoterBinding	Resistin and TNF-a expression, both of which induce insulin resistance, are reduced by peroxisome proliferator-activated receptor gamma ligands, suggesting that the insulin-sensitizing effects of peroxisome proliferator-activated receptor gamma agonists are related to their anti-inflammatory properties .	info:pmid/16959586#body:46	16959586	2006	Peroxisome Proliferator-Activated Receptor Gamma Agonists: Their Role as Vasoprotective Agents in Diabetes
PPARG ---| TNF		PromoterBinding	Rosiglitazone stimulation of PPAR-? expressed in microglia might lead to reduced microglial activation and TNF-a production, therefore reverting PPAR-? to control levels and at the same time reducing the damage induced by TNF-a in dopamine neurons.	info:pmid/21839812#body:158	21839812	2011	Rosiglitazone decreases peroxisome proliferator receptor-gamma levels in microglia and inhibits TNF-alpha production: new evidences on neuroprotection in a progressive Parkinson's disease model
PPARG ---| TNF		PromoterBinding	Similarly, after stimulation with apoptotic cells, Peroxisome proliferator-activated receptor? sumoylation prevented LPS-induced clearance of nuclear receptor co-repressor from the NF?B site within TNF-a promoter in murine macrophages ( ).	info:pmid/20627123#body:154	20627123	2010	Emerging roles of SUMO modification in arthritis
PPARG ---| TNF		PromoterBinding	Overexpression of PPAR? significantly attenuated oxygen-glucose deprivation/reper-fusion-induced expression of iNOS, TNF-a and IFN-? at the mRNA levels (Fig. 2A-C; for iNOS, Model+PPAR? group vs. Model group, P<0.001, Model+PPAR?-shRNA group, P<0.001; for TNF-a, Model+PPAR? group vs.	info:pmid/27633957#cont:97	27633957	2016	Involvement of peroxisome proliferator activated receptor in the anti-inflammatory effects of atorvastatin in oxygen-glucose deprivation/reperfusion-stimulated RAW264.7 murine macrophages
PPARG ---| TNF		PromoterBinding	In primary cultured rat Kupffer cells, peroxisome proliferator-activated receptor? and RXR agonists caused inhibition of lipopolysaccharide-induced production of nitric oxide and TNFa, suggesting that peroxisome proliferator-activated receptor?/RXR ligands might be useful in treatment of hepatic injury associated with endotoxic shock ( ).	info:pmid/15236764#body:140	15236764	2004	Circulating adiponectin levels increase in rats on caloric restriction: the potential for insulin sensitization
PPARG ---| TNF		PromoterBinding		Admin imported
PPARG ---| TNF		PromoterBinding	Peroxisome proliferator-activated receptor? activation has been shown to suppress TNF-a and interleukin-1ß expression.	info:pmid/100376350	100376350	2002	The peroxisome proliferator-activated receptor gamma (PPAR?) is highly expressed in human heart ventricles
PPARG ---| TNF		PromoterBinding	Peroxisome proliferator-activated receptor? activation has been shown to suppress TNF-a and interleukin-1ß expression.	info:doi/10.1016/S0753-3322(02)00251-2#body:60	100376350	2002	The peroxisome proliferator-activated receptor gamma (PPAR?) is highly expressed in human heart ventricles
PPARG ---| TNF		PromoterBinding	Capsaicin further inhibited the production of TNF-a, which might be mediated by peroxisome proliferator-activated receptor? activation ( ).	info:doi/10.1016/j.foodchem.2010.03.041#body:93		2010	Anti-inflammatory activity of extracts from fruits, herbs and spices
NOS2 --+> lung squamous cell carcinoma		Regulation	COX-2 and iNOS, two inflammation related enzymes, playing important roles in the carcinogenesis of 3-methylcholanthrene and diethylinitrosamine, induce rat lung squamous cell carcinoma as well as its metastasis.	info:pmid/12408753#abs:10	12408753	2002	Expression of inflammation related enzymes during experimental rat lung carcinogenesis.
NOS2 --+> lung squamous cell carcinoma		Regulation	Macrophage inducible nitric oxide synthase promotes the initiation of lung squamous cell carcinoma by maintaining circulated inflammation.	info:pmid/29844374#title:1	29844374	2018	Macrophage inducible nitric oxide synthase promotes the initiation of lung squamous cell carcinoma by maintaining circulated inflammation.
NOS2 --+> lung squamous cell carcinoma		Regulation	Because NOS2 depletion significantly decreases lung squamous cell carcinoma incidence in KA/KA;Nos2-/- mice5, this model offers an opportunity to elucidate the mechanism underlying macrophage NOS2’s function in lung carcinogenesis.	info:pmid/29844374#cont:17	29844374	2018	Macrophage inducible nitric oxide synthase promotes the initiation of lung squamous cell carcinoma by maintaining circulated inflammation comment
NOS2 --+> lung squamous cell carcinoma		Regulation	NOS2 ablation decreases infiltrating macrophage numbers, pulmonary inflammation, and lung squamous cell carcinoma incidence5, suggesting that macrophage NOS2 maintains an elevated inflammatory status that promotes carcinogenesis.	info:pmid/29844374#cont:20	29844374	2018	Macrophage inducible nitric oxide synthase promotes the initiation of lung squamous cell carcinoma by maintaining circulated inflammation comment
PPARG ---| TNF		MolTransport	In vitro results indicated that wogonin significantly decreased the secretion of IL-6, IL-1ß and tumour necrosis factor-a in Ana-1 and RAW264.7 cells, which was suppressed by transfection of PPAR? small interfering RNA and GW9662 treatment.	info:pmid/24766487#abs:8	24766487	2014	Wogonin prevents lipopolysaccharide-induced acute lung injury and inflammation in mice via peroxisome proliferator-activated receptor gamma-mediated attenuation of the nuclear factor-kappaB pathway.
PPARG ---| TNF		MolTransport	High concentrations of PPARgamma ligands were shown to have anti-inflammatory activities by inhibiting the secretion of interleukin-1 , interleukin-6 (IL-6) and tumour necrosis factor alpha (TNFalpha) by stimulated monocytes.	info:pmid/12160520#abs:5	12160520	2002	Regulation of the interleukin-1 receptor antagonist in THP-1 cells by ligands of the peroxisome proliferator-activated receptor gamma.
PPARG ---| TNF		MolTransport	We observed that all PPARgamma ligands inhibited dose-dependently the release of TNF-alpha, GM-CSF, IL-1alpha, IL-6 and the chemokines CXCL8 (IL-8) and CCL5 (RANTES) from respiratory syncytial virus-infected A549 cells.	info:pmid/16330064#abs:4	16330064	2006	Peroxisome-proliferator-activated receptor-gamma agonists inhibit the release of proinflammatory cytokines from RSV-infected epithelial cells.
PPARG ---| TNF		MolTransport	GMAb blocked GM-CSF signaling causing (1) a milky-appearing bronchoalveolar lavage fluid containing increased surfactant lipids and proteins; (2) enlarged, foamy, surfactant-filled alveolar macrophages with reduced PU.1 and PPARgamma mRNA, and reduced tumor necrosis factor-alpha secretion; (3) pulmonary leukocytosis; (4) increased serum surfactant protein-D; and (5) impaired neutrophil functions.	info:pmid/20224064#abs:6	20224064	2010	Patient-derived granulocyte/macrophage colony-stimulating factor autoantibodies reproduce pulmonary alveolar proteinosis in nonhuman primates.
PPARG ---| TNF		MolTransport	Both PPAR? ligands dramatically decreased the release of IL-6, IL-8, and TNF-a.	info:pmid/16952358#body:125	16952358	2006	An in vivo murine model of rosiglitazone use in pregnancy
PPARG ---| TNF		MolTransport	PPAR? reduces monocyte secretion of IL-1ß and IL-6 and TNFa.	info:pmid/10408502#body:105	10408502	1999	Medical significance of peroxisome proliferator-activated receptors
PPARG ---| TNF		MolTransport	PPAR- ? agonists inhibit the release of IL-1a and TNF-a from RSV-infected A549 cells .	info:pmid/22609261#body:81	22609261	2012	Ciglitazone inhibits cigarette smoke solution-induced inflammatory responses in human middle ear epithelial cells
PPARG ---| TNF		MolTransport	It is supposed that PPAR-g may be involved in ovulation and luteinization by inhibiting the secretion of TNF-a.66	info:pmid/22076494#cont:220	22076494	2012	Mechanistic links between oxidative/nitrosative stress and tumor necrosis factor alpha in letrozole-induced murine polycystic ovary: Biochemical and pathological evidences for beneficial effect of pioglitazone
PPARG ---| TNF		MolTransport	peroxisomal proliferator-activated receptor gamma reduces monocytes secretion of IL-1ß, and IL-6 and TNF-a .	info:pmid/10989324#body:386	10989324	2000	Obesity and cardiovascular disease:Pathogenetic role of the metabolic syndrome and therapeutic implications
PPARG ---| TNF		MolTransport	PPARg agonists reduce the gene expression and the secretion of proinflammatory cytokines including TNF-a, IL-1b, and IL-6.	info:pmid/23339672#cont:238	23339672	2012	The inflammatory process underlying atherosclerosis
PPARG ---| TNF		MolTransport	Furthermore, we have also elucidated the relevant molecular mechanisms involving reactive oxygen species-enhanced TNF-a secretion resulted from PPAR? ...	info:pmid/23373752#cont:42	23373752	2013	Oxidative stress in malignant melanoma enhances tumor necrosis factor-a secretion of tumor-associated macrophages that promote cancer cell invasion
PPARG ---| TNF		MolTransport	... , this enhancement of TNF-a secretion is proved to be contributed by reactive oxygen species-increased peroxisome proliferator-activated receptor ? ...	info:pmid/23373752#cont:17	23373752	2013	Oxidative stress in malignant melanoma enhances tumor necrosis factor-a secretion of tumor-associated macrophages that promote cancer cell invasion
PPARG ---| TNF		MolTransport	Specifically, peroxisome proliferator-activated receptor-? activation reduces monocyte secretion of IL-1ß, IL-6, and TNF-a.	info:pmid/16159895#body:186	16159895	2006	Anti-inflammatory effects of short-term pioglitazone therapy in men with advanced diabetic nephropathy.
PPARG ---| TNF		MolTransport	In conclusion, the activation of Peroxisome proliferator-activated receptor? by troglitazone reduced the LPS-induced release of TNF-a.	info:pmid/21153920#cont:139	21153920	2011	Troglitazone-activated PPARc inhibits LPS-induced lung alveolar type II epithelial cells injuries via TNF-a
PPARG ---| TNF		MolTransport	Hence, these data prove that PPAR? can downregulate proinvasion capacity of tumor-associated macrophages by attenuating their TNF-a secretion.	info:pmid/23373752#cont:193	23373752	2013	Oxidative stress in malignant melanoma enhances tumor necrosis factor-a secretion of tumor-associated macrophages that promote cancer cell invasion
PPARG ---| TNF		MolTransport	PPAR?-RXR agonists inhibit malaria-induced secretion of tumor necrosis factor a from human monocytes .	info:pmid/14519584#body:106	14519584	2003	CD36 and malaria: friends or foes?
PPARG ---| TNF		MolTransport	Activation of PPAR-? suppressed inflammatory responses by inhibiting the release of interleukins-1ß, IL-6, TNF-a and expression	info:pmid/22199113#cont:223	22199113	2011	Preventive action of curcumin in experimental acute pancreatitis in mouse
PPARG ---| TNF		MolTransport	Peroxisome proliferator-activated receptor-g (PPARg) antagonist prevents telmisartan amelioration of lipopolysaccharide -induced tumor necrosis factor-a (TNFa) release.	info:pmid/22124178#cont:661	22124178	2012	Telmisartan ameliorates lipopolysaccharide-induced innate immune response through peroxisome proliferator-activated receptor-? activation in human monocytes
PPARG ---| TNF		MolTransport	... , PPAR-g activation inhibits macrophage activation and proinflammatory cytokine production, enhances adiponectin secretion, inhibits TNF-a and resistin ...	info:pmid/20969475#cont:397	20969475	2011	Redox balance in the pathogenesis of nonalcoholic fatty liver disease: Mechanisms and therapeutic opportunities
PPARG ---| TNF		MolTransport	knockout models, and secretion of both IL-6 and TNF-a is inhibited equally in both wild type and Peroxisome proliferator-activated receptor? deficient macrophages [111].	info:pmid/30420872#cont:306	30420872	2018	Signaling Mechanisms of Selective PPAR ? Modulators in Alzheimer's Disease
PPARG ---| TNF		MolTransport	PPAR? activation by 15d-PGJ2 and ciglitazone in macrophages was shown to inhibit the LPS-mediated release of TNF-a and increase in IL-10 production .	info:pmid/27376854#body:145	27376854	2016	Potentiation of indomethacin-induced anti-inflammatory response by pioglitazone in carrageenan-induced acute inflammation in rats: Role of PPAR? receptors
PPARG ---| TNF		MolTransport	Several groups have reported that peroxisome proliferative-activated receptor gamma ligands (like thiazolidinediones) could reduce the release of tumor necrosis factor-a and IL-6 from macrophages ( ).	info:pmid/17936320#body:125	17936320	2007	Arsenic-induced alteration in the expression of genes related to type 2 diabetes mellitus
PPARG ---| TNF		MolTransport	It is possible that PPAR-? mediates also the inhibitory effect of indomethacin on TNF-a release from Dendritic cells since this drug has been shown to activate PPAR-? with an EC 50 of ~40 µM .	info:pmid/12781703#body:169	12781703	2003	Exogenous but not endogenous prostanoids regulate cytokine secretion from murine bone marrow dendritic cells: EP 2, DP, and IP but not EP 1, EP 3, and FP prostanoid receptors are involved
PPARG ---| TNF		MolTransport	In addition, Peroxisome proliferator-activated receptor-? ligands inhibited the induction of an NO synthase, gelatinase B, and scavenger receptor A , and reduced the secretion of IL-1ß and TNF-a .	info:pmid/11311328#body:97	11311328	2001	Amelioration of experimental autoimmune encephalomyelitis in C57BL/6 mice by an agonist of peroxisome proliferator-activated receptor-?
PPARG ---| TNF		MolTransport	PPAR? also modulates the production and secretion of adipokines, including adiponectin, resistin, tumor necrosis factor a (TNFa), interleukin-6 (IL-6), and monocyte chemoattractant protein MCP-1 .	info:pmid/22513163#body:31	22513163	2012	Thiazolidinediones and PPAR? agonists: time for a reassessment
PPARG ---| TNF		MolTransport	For instance, peroxisome proliferator-activated receptor? agonists inhibit the expression and/or secretion of tumour necrosis factor a (TNFa) and plasminogen activator inhibitor 1 (PAI1), both of which promote insulin resistance ( ).	info:pmid/19772894#body:129	19772894	2010	PPARs and adipocyte function
PPARG ---| TNF		MolTransport	Insulin was used to observe the effects of rosiglitazone in this system; as such, we demonstrated that the peroxisome proliferator-activated receptor-? agonist, rosiglitazone, attenuates resistin-induced secretion of TNF-a and IL-6.	info:pmid/17062773#body:243	17062773	2007	The in vitro effects of resistin on the innate immune signaling pathway in isolated human subcutaneous adipocytes.
PPARG ---| TNF		MolTransport	As shown in , pretreatment of neonatal cardiomyocytes with Peroxisome proliferator-activated receptor-? agonists significantly decreased lipopolysaccharide-stimulated TNF-a release by cardiac myocytes .	info:pmid/23369225#body:95	23369225	2013	Peroxisome proliferator-activated receptors modulate cardiac dysfunction in diabetic cardiomyopathy
PPARG ---| TNF		MolTransport	For example, PPARgamma activation in vitro inhibits the release of interleukin-1ß, tumor necrosis factor-alpha, interleukin-12p40, and IFN-gamma from LPS-activated macrophages and monocytes (5, 21-23).	info:pmid/14512375#body:148	14512375	2004	Peroxisome proliferator-activated receptor gamma activity is deficient in alveolar macrophages in pulmonary sarcoidosis.
PPARG ---| TNF		MolTransport	Several lines of evidence suggest that ligands for PPAR? such as thiazolidinediones , which are used as antidiabetic drugs, suppress TNF-a, IL-6, and MCP-1 gene expressions and protein release, and enhance adiponectin release .	info:pmid/17719033#body:126	17719033	2007	Capsaicin, a spicy component of hot peppers, modulates adipokine gene expression and protein release from obese-mouse adipose tissues and isolated adipocytes, and suppresses the inflammatory responses of adipose tissue macrophages
PPARG ---| TNF		MolTransport	peroxisome proliferator-activated receptor? agonist like pioglitazone attenuated lipopolysaccharide-induced pulmonary dysfunction, inflammatory cell influx, TNFa release as well as oxidative stress.	info:pmid/19073273#body:129	19073273	2009	Amelioration of pulmonary dysfunction and neutrophilic inflammation by PPAR? agonist in LPS-exposed guinea pigs
PPARG ---| TNF		MolTransport	The PPAR-? ligand 15-deoxy- 12,14-prostaglandin J2 inhibits the secretion of TNF-a and interleukin-6 in macrophages stimulated by bacterial lipopolysaccharide, and mediates anti-inflammatory effects by directly binding and inactivating I-kB kinase .	info:pmid/24295567#body:98	24295567	2013	Type I interferon-mediated pathway interacts with peroxisome proliferator activated receptor-? (PPAR-?): At the cross-road of pancreatic cancer cell proliferation
PPARG ---| TNF		MolTransport	In cultured astrocytes and microglia, peroxisome proliferator activated receptor-? ligands abolish lipopolysaccharide-induced iNOS expression and reduce the release of nitric oxide, TNF-a and IL-6 into the culture medium.	info:pmid/17416424#body:65	17416424	2007	PPAR-?: therapeutic target for ischemic stroke
PPARG ---| TNF		MolTransport	Adherent alveolar macrophages were used to measure PU.1 and PPARg mRNA levels by quantitative polymerase reaction amplification with Taq-Man primers (AB Biosystems, Carlsbad, CA) and endotoxin-stimulated tumor necrosis factor (TNF)-a release as described (16).	info:pmid/20224064#cont:110	20224064	2010	Patient-derived granulocyte/macrophage colony-stimulating factor autoantibodies reproduce pulmonary alveolar proteinosis in nonhuman primates
PPARG ---| TNF		MolTransport	In addition, we have previously shown that stimulation of Peroxisome-proliferator-activated receptor-? by rosiglitazone inhibits microglial release of TNF-a in a Parkinson's disease model, and others have reported concordant results in different neurodegenerative pathologies ( ).	info:pmid/25134730#body:17	25134730	2014	Dynamic changes in pro- and anti-inflammatory cytokines in microglia after PPAR-? agonist neuroprotective treatment in the MPTPp mouse model of progressive Parkinson's disease
PPARG ---| TNF		MolTransport	However, almost coincident with these observations, several groups reported that Peroxisome proliferator-activated receptor? ligands reduce the release of inflammatory cytokines (e.g. TNF-a and IL-6) from macrophages, an effect that might be predicted to be antiatherogenic (88, 89).	info:pmid/12788836#body:217	12788836	2003	The metabolic syndrome: peroxisome proliferator-activated receptor gamma and its therapeutic modulation.
PPARG ---| TNF		MolTransport	PPARc ligands have been demonstrated to inhibit the secretion of IL6, IL8, and tumor necrosis factor in amnion and chorion, highlighting the role of PPARc in the regulation of the inflammatory response in human gestational tissues and cells.	info:pmid/24489901#cont:353	24489901	2014	Roles of PPAR?/NF-?B signaling pathway in the pathogenesis of intrahepatic cholestasis of pregnancy
PPARG ---| TNF		MolTransport	peroxisome proliferator-activated receptora [28] and peroxisome proliferator-activated receptor? [29] were shown to repress some other transcription factors, such as nuclear factor-?B signal pathway, to reduce the release of inflammatory cytokines including IL-6 and TNFa, when they were activated by their ligands.	info:pmid/30360404#cont:197	30360404	2018	Nuciferine inhibits proinflammatory cytokines via the PPARs in LPS-induced RAW264.7 cells
PPARG ---| TNF		MolTransport	On one hand, PPAR? has been shown to attenuate the expression and secretion of proinflammatory cytokines (including IL-1ß and TNF-a) associated with M1 macrophages (6); on the other hand, it reduces macrophage activity via trans-repression of NF-?B (7).	info:pmid/26858440#cont:23	26858440	2016	Effective treatment of steatosis and steatohepatitis by fibroblast growth factor 1 in mouse models of nonalcoholic fatty liver disease
PPARG ---| TNF		MolTransport	In addition, it has been demonstrated that peroxisome proliferator-activated receptor?-agonists suppress the synthesis and release of immunomodulatory cytokines/chemokines (eg, interleukin-1ß, tumor necrosis factor-a, and interferon-?) from various cell types and modulate cell cycle, differentiation, and apoptosis.	info:pmid/20363918#body:10	20363918	2010	Peroxisome Proliferator-Activated Receptor (PPAR)? Can Inhibit Chronic Renal Allograft Damage
PPARG ---| TNF		MolTransport	Peroxisome proliferator-activated receptor gamma-retinoid X receptor agonists increase CD36-dependent phagocytosis of Plasmodium falciparum-parasitized erythrocytes and decrease malaria-induced TNF-alpha secretion by monocytes/macrophages.	info:pmid/11359831#title:1	11359831	2001	Peroxisome proliferator-activated receptor gamma-retinoid X receptor agonists increase CD36-dependent phagocytosis of Plasmodium falciparum-parasitized erythrocytes and decrease malaria-induced TNF-alpha secretion by monocytes/macrophages.
PPARG ---| TNF		MolTransport	Peroxisome proliferator-activated receptor gamma-retinoid X receptor agonists increase CD36-dependent phagocytosis of Plasmodium falciparum-parasitized erythrocytes and decrease malaria-induced TNF-alpha secretion by monocytes/macrophages.	info:pmid/22184632#cont:779	22184632	2012	Reduced CD36-dependent tissue sequestration of Plasmodium-infected erythrocytes is detrimental to malaria parasite growth in vivo
PPARG ---| TNF		MolTransport	In resting monocytes, it has been reported that PPAR? blocks all maturation-mediated by phorbol esters and interferon, and suppresses macrophage secretion of inflammatory cytokines, such as TNFa, IL-6, and IL-1a, suggesting a potential PPAR?-mediated anti-inflammatory effect .	info:pmid/11755918#body:15	11755918	2002	Upregulation of interleukin-8 expression by prostaglandin D2 metabolite 15-deoxy-delta12, 14 prostaglandin J2 (15d-PGJ2) in human THP-1 macrophages
PPARG ---| TNF		MolTransport	Natural ligands of peroxisome proliferator-activated receptor-? have been demonstrated to inhibit the secretion of IL-6, IL-8, and TNF-a in amnion and chorion,64 demonstrating the role of peroxisome proliferator-activated receptors in regulating the inflammatory response in human gestational tissues and cells.65,66	info:pmid/22222510#cont:734	22222510	2012	Amniotic membrane induces peroxisome proliferator-activated receptor-? positive alternatively activated macrophages
PPARG ---| TNF		MolTransport	peroxisome proliferator-activated receptor? could inhibit atherosclerosis either by direct inhibition of proinflammatory genes (27) or indirectly through liver X receptor a (28), further, by negatively interfering with AP-1, NF?B, and STAT signaling pathways (29) or by reducing tumor necrosis factor-a, IL-1, and IL-6 secretion (30).	info:pmid/21700710#cont:45	21700710	2011	Peroxisome proliferator-activated receptor ? induces apoptosis and inhibits autophagy of human monocyte-derived macrophages via induction of cathepsin L: Potential role in atherosclerosis
PPARG ---| TNF		MolTransport	Furthermore, the finding that the peroxisome proliferator-activated receptor? antagonist GW9662 enhances substance P-induced TNFa release from monocytes further supports the possibility that NK1R-mediated peroxisome proliferator-activated receptor? regulation is a novel mechanism of modulation of macrophage function, which is induced by substance P and might contribute to a range of chronic infla…	info:pmid/19427266#body:76	19427266	2009	Neurokinin 1 receptor isoforms and the control of innate immunity
PPARG ---| TNF		MolTransport	Interestingly, the antiproliferative effect of PPAR? activators in papillary thyroid carcinoma is dissociated from the ability to inhibit the IFN?-stimulated CXCL10 secretion: PPAR? activators increase the IFN? and TNFa stimulated CXCL10 secretion in papillary thyroid carcinoma, in contrast to that observed in normal thyroid follicular cells, where an inhibitory role of thiazolidinediones was obs…	info:pmid/19755523#body:281	19755523	2009	Dysregulation of secretion of CXC alpha-chemokine CXCL10 in papillary thyroid cancer: modulation by peroxisome proliferator-activated receptor-gamma agonists.
PPARG ---| TNF		MolTransport	Measurements and Main Results: GMAb blocked GM-CSF signaling causing (1) a milky-appearing bronchoalveolar lavage fluid containing increased surfactant lipids and proteins; (2) enlarged, foamy, surfactant-filled alveolar macrophages with reduced PU.1 and PPARg mRNA, and reduced tumor necrosis factor-a secretion; (3) pulmonary leukocytosis; (4) increased serum surfactant protein-D; and (5) impaire…	info:pmid/20224064#cont:8	20224064	2010	Patient-derived granulocyte/macrophage colony-stimulating factor autoantibodies reproduce pulmonary alveolar proteinosis in nonhuman primates
PPARG ---| TNF		MolTransport	... PPAR? expression may derive from activation of genes responsible for cholesterol efflux, thus shifting the balance from lipid loading to lipid efflux.8 Recent studies, however, have not confirmed the role of PPAR? ligands in cholesterol efflux by macrophages.9,10 PPAR? may also exert antiinflammatory effects in macrophages directly,11 or through LXRa12 by negatively interfering with the AP-1,…	info:pmid/15947238#body:60	15947238	2005	Conditional knockout of macrophage PPARgamma increases atherosclerosis in C57BL/6 and low-density lipoprotein receptor-deficient mice.
PPARG ---| TNF		MolTransport		Admin imported
PPARG ---| TNF		MolTransport	In addition, PPAR-? ligands suppress TNF-a secretion in adipocytes and macrophages and increase adipose production of adiponectin.	info:doi/10.1016/S0002-9149(03)00610-6#body:79		2003	The central role of fat and effect of peroxisome proliferator-activated receptor-? on progression of insulin resistance and cardiovascular disease
PPARG ---| TNF		MolTransport	PPAR? also modulates the production and secretion of adipokines, including adiponectin, resistin, tumor necrosis factor a (TNFa), interleukin-6 (IL-6), and monocyte chemoattractant protein MCP-1 .	info:doi/10.1016/j.tem.2012.03.001#body:31		2012	Thiazolidinediones and PPAR? agonists: time for a reassessment
PPARG ---| TNF		MolTransport	They found that peroxisome proliferator-activated receptor ? agonists (pioglitazone or rosiglitazone) increase interferon ? and tumor necrosis factor a release in extra-ocular muscle cells from patients with Graves' ophthalmopathy.	info:doi/10.1016/j.autrev.2014.10.015#body:74		2014	Autoimmunity cutting edge at the 21st century. Representation of the 9th International Congress of Autoimmunity, Nice, France 2014'
PPARG ---| TNF		MolTransport	High concentrations of Peroxisome proliferator activated receptor? ligands were shown to have anti-inflammatory activities by inhibiting the secretion of interleukin-1 , interleukin-6 (IL-6) and tumor necrosis factor alpha (TNF-a) by stimulated monocytes .	info:doi/10.1016/j.ejr.2015.10.001#body:79		2015	Peroxisome proliferator-activated receptor gamma expression in peripheral monocytes from rheumatoid arthritis patients
PPARG ---| TNF		MolTransport	More recently, it has been demonstrated that PPAR? agonists increase CD36-dependent phagocytosis of Plasmodium falciparum-parasitized erythrocytes and decrease parasite-induced TNF-a secretion by monocytes/macrophages .	info:doi/10.1016/S1074-7613(03)00229-2#body:25		2003	PPAR? Promotes Mannose Receptor Gene Expression in Murine Macrophages and Contributes to the Induction of This Receptor by IL-13
PPARG ---| TNF		MolTransport	In addition, it has been demonstrated that peroxisome proliferator-activated receptor?-agonists suppress the synthesis and release of immunomodulatory cytokines/chemokines (eg, interleukin-1ß, tumor necrosis factor-a, and interferon-?) from various cell types and modulate cell cycle, differentiation, and apoptosis.	info:doi/10.2353/ajpath.2010.090370#body:10		2010	Peroxisome Proliferator-Activated Receptor (PPAR)? Can Inhibit Chronic Renal Allograft Damage
PPARG ---| TNF		MolTransport	In addition, it has been shown that peroxisome proliferator-activated receptor? activation in macrophages reduces release of inflammatory cytokines, such as tumor necrosis factor (TNF)a, interleukin -1a and IL-6 and suppresses the expression of MMP-9, which would also have an anti-atherogenic effect .	info:doi/10.1016/S0006-291X(03)01416-5#body:90		2003	Microarray analysis of peroxisome proliferator-activated receptor-? induced changes in gene expression in macrophages
PPARG ---| TNF		MolTransport	Peroxisome proliferator-activated receptor-? ligands have been demonstrated to inhibit the secretion of IL-6, IL-8, and TNFa in amnion and chorion (Lappas et al., 2006), highlighting the role of Peroxisome proliferator-activated receptors in the regulation of the inflammatory response in human gestational tissues and cells (Lappas et al., 2002; Ackerman et al., 2005).	info:doi/10.14670/HH-11-734#cont:46		2016	Expression of peroxisome proliferators activation receptors (PPARS) and TNFa in placenta tissues in unexplained recurrent pregnancy loss: An immunohistochemical study
PPARG ---| NOS2		PromoterBinding	Thus, ligand-activated PPAR a and/or PPAR ? results in down-regulation of cyclooxygenase 2 and iNOS gene expression ( ).	info:pmid/14769484	14769484	2004	The ketogenic diet; fatty acids, fatty acid-activated receptors and neurological disorders
PPARG ---| NOS2		PromoterBinding	These results indicate that PPARgamma is not necessary for inhibition of iNOS expression by synthetic PPARgamma agonists at concentrations over 10 microM.	info:pmid/15356214#abs:11
PPARG ---| NOS2		PromoterBinding	The ultrasound -induced elevation of COX-2 and iNOS expression and nitric oxide production were attenuated in the presence of PPARgamma ligands.	info:pmid/17669705#abs:7	17669705	2007	PPARgamma inhibits osteogenesis via the down-regulation of the expression of COX-2 and iNOS in rats.
PPARG ---| NOS2		PromoterBinding	The ultrasound -induced elevation of COX-2 and iNOS expression and nitric oxide production were attenuated in the presence of PPARgamma ligands.	info:pmid/17669705	17669705	2007	PPARgamma inhibits osteogenesis via the down-regulation of the expression of COX-2 and iNOS in rats.
PPARG ---| NOS2		PromoterBinding	PPARgamma transduction resulted in significantly decreased iNOS and IFN-gamma mRNA expression, as well as reduced bronchoalveolar lavage lymphocytes.	info:pmid/19380830#abs:11		2009
PPARG ---| NOS2		PromoterBinding	Activation of PPAR-gamma by rosiglitazone inhibited AGE-induced iNOS expression, nitrite release, and p38 MAPK activation in mesangial cells.	info:pmid/15086905#abs:7
PPARG ---| NOS2		PromoterBinding	In Alzeimer's disease, peroxisome proliferator activated receptor-? agonists improved cognition of patients by reducing the expression of iNOS ( ).	info:pmid/22436324	22436324	2012	Possible involvement of PPAR-gamma receptor and nitric oxide pathway in the anticonvulsant effect of acute pioglitazone on pentylenetetrazole-induced seizures in mice
PPARG ---| NOS2		PromoterBinding	The molecular mechanism by which resveratrol inhibited iNOS gene expression appeared to involve increased PPAR-? activity, which resulted in the inhibition of nuclear factor-?B activation.	info:pmid/23554653#abs:10	23554653	2010	Resveratrol prevents interleukin-1ß-induced dysfunction of pancreatic ß-cells.
PPARG ---| NOS2		PromoterBinding	PPARgamma agonists reduce iNOS expression and nitric oxide production in a dose-dependent manner in macrophages, mesangial cells and other inflammatory cells.	info:pmid/15950726#abs:2		2005
PPARG ---| NOS2		PromoterBinding	Conversely, overexpression of PPAR? significantly attenuated oxygen-glucose deprivation/reperfusion-induced alterations in the expression of iNOS, TNF-a, IFN-? and CD206 at the mRNA and protein levels.	info:pmid/27633957#abs:6	27633957	2016	Involvement of peroxisome proliferator activated receptor-? in the anti-inflammatory effects of atorvastatin in oxygen-glucose deprivation/reperfusion-stimulated RAW264.7 murine macrophages.
PPARG ---| NOS2		PromoterBinding	Activation of PPAR? in the donor suppresses expressions of proinflammatory cytokines including tumor necrosis factor-a (TNF-a) and inducible nitric oxide synthase (iNOS) in transplanted islets.	info:pmid/22469179#abs:7	22469179	2012	Activation of peroxisome proliferator-activated receptor ? prolongs islet allograft survival.
PPARG ---| NOS2		PromoterBinding	In response to rosigilitazone, Peroxisome proliferator-activated receptor? is sumoylated and indirectly recruited to the iNOS promoter through ligand-dependent association with the nuclear receptor corepressor (NcoR).	info:pmid/16476485	16476485	2006	From molecular action to physiological outputs: Peroxisome proliferator-activated receptors are nuclear receptors at the crossroads of key cellular functions
PPARG ---| NOS2		PromoterBinding	These assays indicated that PPAR? and liver X receptors were both recruited to the inos, il1ß, and tnfa promoters in a ligand-dependent manner ( A), suggesting that the SUMOylated receptors are interrupting distinct signaling inputs that are responsible for NCoR clearance.	info:pmid/17218271	17218271	2007	Parallel SUMOylation-Dependent Pathways Mediate Gene- and Signal-Specific Transrepression by LXRs and PPAR?
PPARG ---| NOS2		PromoterBinding	The androstenediol-mediated salutary effects on cardiac function following trauma-hemorrhage appear to be mediated at least in part via PPAR-gamma activation, which down-regulates IL-6 and iNOS gene expression in the heart.	info:pmid/16794398#abs:12		2006
PPARG ---| NOS2		PromoterBinding	These results suggest that only the natural PPARgamma ligand, 15-deoxy-Delta12,14 prostaglandin J2, but not the synthetic one, rosiglitazone, regulates the inflammatory response by inhibition of inducible NO synthase, cyclooxygenase 2, and metalloproteinase 9 expression.	info:pmid/19997048#abs:9	19997048	2010	15-deoxy-Delta12,14 prostaglandin GJ2 but not rosiglitazone regulates metalloproteinase 9, NOS-2, and cyclooxygenase 2 expression and functions by peroxisome proliferator-activated receptor gamma-dependent and -independent mechanisms in cardiac cells.
PPARG ---| NOS2		PromoterBinding	A novel transrepression mechanism was reported in 2005 by Pascual et al. who demonstrated how ligand-activated Peroxisome Proliferators Activated Receptor? inhibits the expression of inducible nitric oxide synthase (iNOS) that was studied as a prototypic inflammatory gene that is sensitive to Nuclear receptor-dependent transrepression.	info:pmid/21193033	21193033	2011	Liver X receptors as regulators of macrophage inflammatory and metabolic pathways
PPARG ---| NOS2		PromoterBinding	Furthermore, we identified a peroxisome proliferator response element in the murine iNOS promoter that binds PPAR? in vitro and found that the peroxisome proliferator response element is not necessary for the inhibition of iNOS expression by a synthetic agonist, but likely is involved in regulating basal expression and intrinsic down-regulation, possibly through an endogenous agonist.	info:pmid/15950726	15950726	2005	A novel PPAR response element in the murine iNOS promoter
PPARG ---| NOS2		PromoterBinding	Because nuclear factor-kappaB-dependent expression of inducible nitric oxide synthase (NOS2) can be antagonized by the nuclear orphan receptor peroxisome proliferator-activated receptor-gamma (PPARgamma), we postulated that a novel agonist of this receptor, 1,1-bis(3'-indolyl)-1-(p-trifluoromethylphenyl)methane (cDIM1), would suppress expression of NOS2 in astrocytes and protect cocultured neuron…	info:pmid/18041089#abs:4		2008
PPARG ---| NOS2		PromoterBinding	Thus, ligand-activated PPAR a and/or PPAR ? results in down-regulation of cyclooxygenase 2 and iNOS gene expression ( ).	info:pmid/14769484#body:139	14769484	2004	The ketogenic diet; fatty acids, fatty acid-activated receptors and neurological disorders
PPARG ---| NOS2		PromoterBinding	Notably, overexpression of PPAR? in RAW264.7 cells abrogated the oxygen-glucose deprivation/reperfusion-induced expression of iNOS, TNF-a and IFN-?.	info:pmid/27633957#cont:114	27633957	2016	Involvement of peroxisome proliferator activated receptor in the anti-inflammatory effects of atorvastatin in oxygen-glucose deprivation/reperfusion-stimulated RAW264.7 murine macrophages
PPARG ---| NOS2		PromoterBinding	Overexpression of PPAR? abrogated the oxygen-glucose deprivation/reperfusion-induced alterations of iNOS, TNF-a, IFN-? and CD206 expression levels.	info:pmid/27633957#cont:180	27633957	2016	Involvement of peroxisome proliferator activated receptor in the anti-inflammatory effects of atorvastatin in oxygen-glucose deprivation/reperfusion-stimulated RAW264.7 murine macrophages
PPARG ---| NOS2		PromoterBinding	LPS induces the expression of iNOS in macrophages, and PPAR-? agonists have been shown to negatively regulate iNOS expression[24].	info:pmid/28649126#cont:203	28649126	2017	Cis-stilbene glucoside in Polygonum multiflorum induces immunological idiosyncratic hepatotoxicity in LPS-treated rats by suppressing PPAR-?
PPARG ---| NOS2		PromoterBinding	In Alzeimer's disease, peroxisome proliferator activated receptor-? agonists improved cognition of patients by reducing the expression of iNOS ( ).	info:pmid/22436324#body:90	22436324	2012	Possible involvement of PPAR-gamma receptor and nitric oxide pathway in the anticonvulsant effect of acute pioglitazone on pentylenetetrazole-induced seizures in mice
PPARG ---| NOS2		PromoterBinding	Peroxisome proliferator-activated receptor-gamma agonists suppress iNOS expression induced by LPS in rat primary Schwann cells.	info:pmid/19942298#title:1	19942298	2010	Peroxisome proliferator-activated receptor-gamma agonists suppress iNOS expression induced by LPS in rat primary Schwann cells.
PPARG ---| NOS2		PromoterBinding	Activation of PPAR-gamma by carbon monoxide from CORM-2 leads to the inhibition of iNOS but not COX-2 expression in LPS-stimulated macrophages.	info:pmid/19705266#title:1	19705266	2009	Activation of PPAR-gamma by carbon monoxide from CORM-2 leads to the inhibition of iNOS but not COX-2 expression in LPS-stimulated macrophages.
PPARG ---| NOS2		PromoterBinding	PPAR? overexpression decreased the expression of iNOS, TNF-a and IFN-?, and increased the expression of CD206 at the protein level compared with model cells.	info:pmid/27633957#cont:123	27633957	2016	Involvement of peroxisome proliferator activated receptor in the anti-inflammatory effects of atorvastatin in oxygen-glucose deprivation/reperfusion-stimulated RAW264.7 murine macrophages
PPARG ---| NOS2		PromoterBinding	In the present study, PPAR? was demonstrated to regulate oxygen-glucose deprivation/reperfusion-induced alterations in the expression levels of iNOS, CD206, TNFa and IFN?.	info:pmid/27633957#cont:193	27633957	2016	Involvement of peroxisome proliferator activated receptor in the anti-inflammatory effects of atorvastatin in oxygen-glucose deprivation/reperfusion-stimulated RAW264.7 murine macrophages
PPARG ---| NOS2		PromoterBinding	Some peroxisome proliferator-activated receptor? ligands also reduce NO production and the expression of iNOS in microglial cell cultures stimulated by the endotoxin ( ).	info:pmid/12573457#body:22	12573457	2003	Evidence for the presence of both peroxisome proliferator-activated receptors alpha and beta in the rat spinal cord
PPARG ---| NOS2		PromoterBinding	PPAR? overexpression significantly decreased the expression of iNOS, TNF-a and IFN-?, and significantly increased the expression of CD206 at the mRNA level compared with model cells.	info:pmid/27633957#cont:106	27633957	2016	Involvement of peroxisome proliferator activated receptor in the anti-inflammatory effects of atorvastatin in oxygen-glucose deprivation/reperfusion-stimulated RAW264.7 murine macrophages
PPARG ---| NOS2		PromoterBinding	In response to rosigilitazone, Peroxisome proliferator-activated receptor? is sumoylated and indirectly recruited to the iNOS promoter through ligand-dependent association with the nuclear receptor corepressor (NcoR).	info:pmid/16476485#body:84	16476485	2006	From molecular action to physiological outputs: Peroxisome proliferator-activated receptors are nuclear receptors at the crossroads of key cellular functions
PPARG ---| NOS2		PromoterBinding	Whether peroxisome proliferator-activated receptor? plays a role in regulating iNOS expression and the accumulation of reactive oxygen species and peroxynitrite in shunt lymphatic endothelial cells warrants further study.	info:pmid/27199125#cont:456	27199125	2016	Disrupted NOS signaling in lymphatic endothelial cells exposed to chronically increased pulmonary lymph flow
PPARG ---| NOS2		PromoterBinding	It was also shown that sustained administration of peroxisome proliferator-activated receptor? agonists reduces the expression of the inducible form of nitric oxide synthase and cell death in the cerebellum ( ) or induced neuronal apoptosis ( ).	info:pmid/12573457#body:20	12573457	2003	Evidence for the presence of both peroxisome proliferator-activated receptors alpha and beta in the rat spinal cord
PPARG ---| NOS2		PromoterBinding	It was also shown that sustained administration of peroxisome proliferator-activated receptor? agonists reduces the expression of the inducible form of nitric oxide synthase and cell death in the cerebellum ( ) or induced neuronal apoptosis ( ).	info:pmid/12573457	12573457	2003	Evidence for the presence of both peroxisome proliferator-activated receptors alpha and beta in the rat spinal cord
PPARG ---| NOS2		PromoterBinding	These assays indicated that PPAR? and liver X receptors were both recruited to the inos, il1ß, and tnfa promoters in a ligand-dependent manner ( A), suggesting that the SUMOylated receptors are interrupting distinct signaling inputs that are responsible for NCoR clearance.	info:pmid/17218271#body:95	17218271	2007	Parallel SUMOylation-Dependent Pathways Mediate Gene- and Signal-Specific Transrepression by LXRs and PPAR?
PPARG ---| NOS2		PromoterBinding	The results of the present study demonstrate that overexpres-sion of PPAR? attenuates the oxygen-glucose deprivation/reperfusion-induced upregulation of iNOS, TNF-a and IFN-? expression, and the downregulation of CD206 expression in RAW264.7 murine macrophages.	info:pmid/27633957#cont:170	27633957	2016	Involvement of peroxisome proliferator activated receptor in the anti-inflammatory effects of atorvastatin in oxygen-glucose deprivation/reperfusion-stimulated RAW264.7 murine macrophages
PPARG ---| NOS2		PromoterBinding	A novel transrepression mechanism was reported in 2005 by Pascual et al. who demonstrated how ligand-activated Peroxisome Proliferators Activated Receptor? inhibits the expression of inducible nitric oxide synthase (iNOS) that was studied as a prototypic inflammatory gene that is sensitive to Nuclear receptor-dependent transrepression.	info:pmid/21193033#body:145	21193033	2011	Liver X receptors as regulators of macrophage inflammatory and metabolic pathways
PPARG ---| NOS2		PromoterBinding	Furthermore, we identified a peroxisome proliferator response element in the murine iNOS promoter that binds PPAR? in vitro and found that the peroxisome proliferator response element is not necessary for the inhibition of iNOS expression by a synthetic agonist, but likely is involved in regulating basal expression and intrinsic down-regulation, possibly through an endogenous agonist.	info:pmid/15950726#body:33	15950726	2005	A novel PPAR response element in the murine iNOS promoter
PPARG ---| NOS2		PromoterBinding		info:pmid/27374313#body:235
PPARG ---| NOS2		PromoterBinding		info:embase/20160328021#cont:212
PPARG ---| NOS2		PromoterBinding		info:pmid/26703532#abs:8
PPARG ---| NOS2		PromoterBinding		info:pmid/26386382#body:121
PPARG ---| NOS2		PromoterBinding		info:pmid/26244663#cont:180
PPARG ---| NOS2		PromoterBinding		info:embase/2015435663#cont:351
PPARG ---| NOS2		PromoterBinding		info:doi/10.1097/FJC.0000000000000287#cont:351
PPARG ---| NOS2		PromoterBinding		Admin imported
PPARG ---| NOS2		PromoterBinding		info:pmid/28975471#cont:182
PPARG ---| NOS2		PromoterBinding		info:pmid/29032144#body:685
PPARG ---| NOS2		PromoterBinding		info:pmid/28798125#abs:3
PPARG ---| NOS2		PromoterBinding		info:doi/10.1016/j.bmcl.2017.04.061#body:14
PPARG ---| NOS2		PromoterBinding		info:doi/10.2174/1570159X14666151230110058#cont:212
PPARG ---| NOS2		PromoterBinding	The regulation of iNOS transcription by conjugated linoleic acid requires peroxisome proliferators-activated receptor?, as demonstrated using a dominant negative construct.	info:pmid/100415812	100415812	2003	Reviews: current topicsrole of nuclear receptors in the regulation of gene expression by dietary fatty acids (review)
PPARG ---| NOS2		PromoterBinding	The regulation of iNOS transcription by conjugated linoleic acid requires peroxisome proliferators-activated receptor?, as demonstrated using a dominant negative construct.	info:doi/10.1016/S0955-2863(03)00098-6#body:267	100415812	2003	Reviews: current topicsrole of nuclear receptors in the regulation of gene expression by dietary fatty acids (review)
PPARG ---| NOS2		PromoterBinding	When the cells were treated with LPS in the presence of a PPAR? agonist, however, PPAR? was recruited to the iNOS promoter, and NCoR and HDAC3 were not cleared.	info:pmid/100575827	100575827	2005	SUMOylation and PPAR?: Wrestling with inflammatory signaling
PPARG ---| NOS2		PromoterBinding	When the cells were treated with LPS in the presence of a PPAR? agonist, however, PPAR? was recruited to the iNOS promoter, and NCoR and HDAC3 were not cleared.	info:doi/10.1016/j.cmet.2005.10.004#body:15	100575827	2005	SUMOylation and PPAR?: Wrestling with inflammatory signaling
PPARG ---| NOS2		PromoterBinding	Pias1 also belongs to the SUMO E3 ligase family and is able to SUMOylate target proteins (e.g., P53). show that PPAR? and Pias1 physically interact and that knocking down Pias1 abolishes the ligand-dependent recruitment of PPAR? to the iNOS promoter and trans-repression.	info:doi/10.1016/j.cmet.2005.10.004#body:23		2005	SUMOylation and PPAR?: Wrestling with inflammatory signaling
STK11 ---| lung squamous cell carcinoma		Regulation	Here, we report that JNK1/2 activities attenuate Lkb1-deficiency-driven lung squamous cell carcinoma initiation and progression through repressing ?Np63 signaling.	info:pmid/31089135#abs:2	31089135	2019	JNK1/2 represses Lkb1-deficiency-induced lung squamous cell carcinoma progression.
STK11 ---| lung squamous cell carcinoma		Regulation	Lkb1 deficiency alone is sufficient to induce lung squamous cell carcinoma.	info:pmid/31089135#cont:49	31089135	2019	JNK1/2 represses Lkb 1-deficiency-induced lung squamous cell carcinoma progression
STK11 ---| lung squamous cell carcinoma		Regulation	Simultaneous inactivation of PTEN and Lkb1 resulted in the development of murine lung SCC, which exhibited elevated PD-L1 expression [44].	info:pmid/26779629#cont:101	26779629	2016	Potential biomarker for checkpoint blockade immunotherapy and treatment strategy
STK11 ---| lung squamous cell carcinoma		Regulation	Here, we report that JNK1/2 activities attenuate Lkb1-deficiency-driven lung squamous cell carcinoma initiation and progression through repressing ?Np63 signaling.	info:pmid/31089135#cont:7	31089135	2019	JNK1/2 represses Lkb 1-deficiency-induced lung squamous cell carcinoma progression
STK11 ---| lung squamous cell carcinoma		Regulation	Furthermore, the merit that Lkb1 ablation alone induces lung squamous cell carcinoma offers a simplified platform for screening other regulators of lung squamous cell carcinoma development.	info:pmid/31089135#cont:498	31089135	2019	JNK1/2 represses Lkb 1-deficiency-induced lung squamous cell carcinoma progression
STK11 ---| lung squamous cell carcinoma		Regulation	Results based on the CCSPiCre system indeed revealed a previously underestimated role of Lkb1 lost-of-function mutation that by itself Lkb1 deficiency is sufficient to initiate lung squamous cell carcinoma, in comparison with any single mutation in either	info:pmid/31089135#cont:496	31089135	2019	JNK1/2 represses Lkb 1-deficiency-induced lung squamous cell carcinoma progression
STK11 ---| lung squamous cell carcinoma		Regulation	In order to examine the possibility that Lkb1 and Pten loss would lead to lung squamous cell carcinoma formation, 6- to 8-week-old Lkb1fl/fl, Ptenfl/fl (Lkb1,Pten or LP) mice were administered Adenovirus-Cre via intranasal instillation ( A).	info:pmid/24794706#body:44	24794706	2014	Loss of Lkb1 and Pten Leads to Lung Squamous Cell Carcinoma with Elevated PD-L1 Expression
STK11 ---| lung squamous cell carcinoma		Regulation	Although a deficiency of either PTEN or Lkb1 did not drive tumor formation, simultaneous inactivation of PTEN and Lkb1 resulted in the development of murine lung squamous cell carcinoma exhibiting elevated PD-L1 expression .	info:pmid/25500094#body:96	25500094	2015	Intrinsic and extrinsic control of expression of the immunoregulatory molecule PD-L1 in epithelial cells and squamous cell carcinoma
STK11 ---| lung squamous cell carcinoma		Regulation	Simultaneous activation of KRAS and inactivation of Lkb1/STK11 are involved in the formation of pulmonary squamous cell carcinomas, whilst inactivation of PTEN and Lkb1 lead to the development of pulmonary squamous cell carcinomas overexpressing PD-L1 [111].	info:pmid/29473504#cont:197	29473504	2017	Immunotherapy in non-small cell lung cancer: Biological principles and future opportunities
STK11 ---| lung squamous cell carcinoma		Regulation	In this study, we generated a mouse lung squamous cell carcinoma model in which the sole ablation of Lkb1 in mouse lung airways is sufficient to induce lung squamous cell carcinoma and have established Lkb1 as a key suppressor gene of lung squamous cell carcinoma.	info:pmid/31089135#cont:485	31089135	2019	JNK1/2 represses Lkb 1-deficiency-induced lung squamous cell carcinoma progression
STK11 ---| lung squamous cell carcinoma		Regulation	Using a previously generated codon-optimized Cre recombinase under the control of the Club Cell Secretory Protein promoter (CCSPiCre) for all airway epithelial cells, including cells of large airways, we found that Lkb1 deficiency by itself is sufficient to induce lung squamous cell carcinoma.	info:pmid/31089135#cont:44	31089135	2019	JNK1/2 represses Lkb 1-deficiency-induced lung squamous cell carcinoma progression
STK11 ---| lung squamous cell carcinoma		Regulation	Our laboratories used ideas from stem cell biology to explore one of the first genetic mouse models of the lung squamous cell carcinoma, driven by conditional bialleleic inactivation of Stk11 (Lkb1) and Pten in the murine lung.	info:doi/10.1016/j.jtho.2015.12.006#body:2		2016	Using stem cell biology to design precision medicine for non-small cell lung cancer
